# Supplementary material for: Best in the company of nearby males: female success in the threatened cycad, Zamia portoricensis
Source: PeerJ. 2018 Jul 24;6:e5252. doi: 10.7717/peerj.5252 (PMC6063211; doi:10.7717/peerj.5252)
Supplement: Data S1 [file peerj-06-5252-s001.xlsx]

## Sheet: ALL INFO
#	x	y	sex	fol	sc	dna
1	1	1	O	22	NR	N			seedlings	2100
2	8	2	O	48	NR	N
3	5	5	F	43	R	N
4	11	2	M	43	R	N			#: number on the spatial distribution map
5	15	2	F	66	R	N			x,y: coordinates
6	8	7	O	29	NR	N			fol: # of leaflets on the longest leaf
7	24	3	F	49	R	N			sc: size class, J juvenile, R reproductive adult, NR non reproductive adult
8	13	5	O	14	J	N			dna: N not sampled for the microsatellite study, S sampled
9	15	9	M	46	R	N
10	11	7	O	22	NR	N
11	0	14	M	26	R	N
12	4	17	O	12	J	N
13	2	21	O	23	NR	N
14	0	24	O	26	NR	N
15	0	35	O	46	NR	N
16	5	36	O	31	NR	N
17	4	40	O	16	J	N
18	1	40	O	17	J	N
19	3	46	O	19	NR	N
20	8	46	M	22	R	N
21	4	52	O	14	J	N
22	2	52	O	15	J	N
25	3	63	O	14	J	N
26	5	65	F	36	R	N
27	9	63	O	16	J	N
28	12	60	M	25	R	N
29	4	69	M	50	R	N
30	2	69	O	19	NR	N
31	2	75	O	26	NR	N
32	7	77	F	53	R	N
33	9	78	O	28	NR	N
34	12	79	O	37	NR	N
35	13	81	O	26	NR	N
36	15	83	O	48	NR	N
37	18	84	F	27	R	N
38	1	87	F	27	R	N
39	5	87	O	18	J	N
40	6	91	M	36	R	N
41	5	94	M	42	R	N
42	1	92	F	51	R	N
43	3	102	M	30	R	N
44	0	103	F	48	R	N
45	7	105	O	28	NR	N
46	9	108	O	18	J	N
47	11	109	O	40	NR	N
48	12	105	O	44	NR	N
49	12	101	O	20	NR	N
50	16	101	O	30	NR	N
51	18	104	O	50	NR	N
52	17	109	O	51	NR	N
53	9	114	O	23	NR	N
54	3	116	M	32	R	N
55	1	130	M	40	R	N
56	8	127	M	33	R	N
57	9	130	O	52	NR	N
58	9	132	O	22	NR	N
59	11	134	O	27	NR	N
60	0	136	M	36	R	N
61	3	141	M	44	R	N
62	8	137	F	32	R	N
63	9	141	F	30	R	N
64	8	147	F	49	R	N
65	8	154	O	29	NR	N
66	14	154	M	38	R	N
67	14	150	O	35	NR	N
68	15	160	F	33	R	N
69	12	165	O	44	NR	N
70	1	166	M	44	R	N
71	0	170	O	30	NR	N
74	0	177	O	18	J	N
75	1	180	M	26	R	N
76	0	182	O	34	NR	N
77	19	5	O	16	J	N
78	15	11	O	18	J	N
79	2	28	O	14	J	N
80	15	20	O	17	J	N
81	22	7	O	32	NR	N
82	21	15	O	17	J	N
83	20	14	O	13	J	N
84	22	10	O	15	J	N
85	30	6	O	16	J	N
86	33	2	F	49	R	N
87	25	2	M	43	R	N
88	33	9	O	19	NR	N
89	34	8	O	18	J	N
90	35	9	O	36	NR	N
91	36	12	O	16	J	N
92	33	26	O	18	J	N
93	42	11	O	14	J	N
94	47	9	O	18	J	N
95	52	7	O	12	J	N
96	55	5	M	19	R	N
97	55	15	O	23	NR	N
98	58	18	O	12	J	N
99	55	20	F	44	R	N
100	55	27	M	34	R	N
101	53	30	O	12	J	N
102	55	18	O	14	J	N
103	63	34	F	52	R	N
104	66	36	F	39	R	N
105	70	40	O	23	NR	N
106	61	21	O	15	J	N
107	81	36	M	36	R	N
108	81	43	O	18	J	N
109	89	48	O	27	NR	N
110	89	1	M	44	R	N
111	119	4	O	16	J	N
112	124	8	M	19	R	N
113	133	9	O	18	J	N
114	133	7	O	18	J	N
115	136	9	O	18	J	N
116	138	19	M	48	R	N
117	147	24	M	44	R	N
118	151	18	M	26	R	N
119	159	25	M	24	R	N
120	151	25	O	12	J	N
121	153	25	O	18	J	N
122	152	32	M	26	R	N
123	147	37	O	16	J	N
124	152	42	O	29	NR	N
125	158	47	O	22	NR	N
126	164	49	O	21	NR	N
127	164	45	O	12	J	N
128	164	54	O	32	NR	N
129	166	53	O	14	J	N
130	176	50	M	54	R	N
131	176	56	O	30	NR	N
132	178	61	F	64	R	N
133	173	40	F	44	R	N
134	172	34	O	14	J	N
135	180	8	O	38	NR	N
136	210	1	O	19	NR	N
137	222	0	F	45	R	N
138	222	8	O	22	NR	N
139	223	12	M	22	R	N
140	223	18	F	53	R	S
141	226	21	O	14	J	N
142	223	22	O	37	NR	N
143	222	25	O	34	NR	N
144	219	22	M	30	R	N
145	220	29	M	34	R	S
146	220	31	F	52	R	S
147	213	33	O	44	NR	S
148	210	33	O	34	NR	S
149	206	31	O	35	NR	S
150	222	34	O	35	NR	S
151	227	36	O	22	NR	S
152	231	42	M	33	R	S
153	229	41	O	50	NR	S
154	227	41	F	43	R	S
155	222	38	O	46	NR	N
156	216	40	F	41	R	N
157	218	43	O	19	NR	N
158	218	46	M	30	R	S
159	218	49	M	26	R	N
160	220	49	M	51	R	S
161	225	49	F	42	R	S
162	220	53	O	22	NR	S
163	224	58	O	18	J	S
164	219	57	M	30	R	S
165	219	58	F	59	R	S
166	210	58	M	48	R	S
167	208	55	O	14	J	N
168	206	58	M	30	R	N
169	206	63	O	46	NR	N
170	203	66	F	54	R	N
171	200	69	O	18	J	N
172	202	72	O	23	NR	N
173	204	74	O	38	NR	N
174	218	65	F	34	R	S
175	221	65	O	20	NR	S
176	224	65	O	12	J	S
177	220	73	M	35	R	S
178	240	0	O	25	NR	N
179	240	3	O	25	NR	N
180	244	0	F	42	R	N
181	238	7	M	27	R	N
182	239	12	F	40	R	N
183	246	4	F	34	R	N
184	244	6	F	43	R	N
185	249	0	O	13	J	N
186	246	12	O	23	NR	N
187	245	17	F	59	R	N
188	241	19	M	44	R	N
189	240	25	O	16	J	N
190	237	25	O	12	J	N
191	250	18	O	12	J	N
201	242	32	O	31	NR	N
202	244	36	F	51	R	N
203	245	39	M	27	R	N
204	242	39	M	32	R	N
205	241	38	O	34	NR	N
206	240	45	O	38	NR	N
207	243	49	F	44	R	N
208	243	57	F	71	R	N
209	243	61	F	61	R	N
210	244	66	M	22	R	N
211	243	72	O	13	J	N
212	245	81	F	65	R	N
213	245	91	F	52	R	N
214	238	88	O	16	J	N
215	235	91	O	14	J	N
216	233	98	M	29	R	N
217	244	98	M	42	R	N
218	235	103	M	30	R	N
219	248	103	F	40	R	N
220	249	106	F	42	R	N
221	250	107	M	28	R	N
222	234	103	F	57	R	N
223	235	99	O	13	J	N
224	248	122	O	12	J	N
225	248	124	O	22	NR	N
226	244	126	O	16	J	N
227	244	131	O	14	J	N
228	238	126	O	30	NR	N
229	246	150	M	38	R	N
230	250	155	M	44	R	N
231	249	159	M	39	R	N
232	246	157	M	22	R	N
233	250	151	O	14	J	N
234	235	196	F	60	R	N
235	223	190	M	55	R	N
236	218	189	M	36	R	N
237	218	164	F	57	R	N
238	198	174	F	71	R	N
239	207	190	O	22	NR	N
240	188	176	O	32	NR	N
241	184	176	O	18	J	N
242	174	188	O	14	J	N
243	175	191	O	18	J	N
244	175	198	F	50	R	N
245	173	194	M	24	R	N
246	158	196	O	31	NR	N
247	151	198	O	12	J	N
248	140	196	O	38	NR	N
249	139	186	F	62	R	N
250	133	191	O	15	J	N
251	135	187	O	12	J	N
252	135	194	O	23	NR	N
253	130	192	O	15	J	N
254	132	200	O	16	J	N
255	118	192	M	38	R	N
256	110	192	M	22	R	N
257	106	191	M	22	R	N
258	103	191	O	36	NR	N
259	103	188	O	24	NR	N
260	101	191	M	49	R	N
261	100	194	O	34	NR	N
262	98	190	O	45	NR	N
263	95	191	F	42	R	N
264	96	192	O	14	J	N
265	93	188	O	16	J	N
266	92	187	O	14	J	N
267	82	195	M	41	R	N
268	93	194	M	30	R	N
269	80	191	M	20	R	N
270	80	187	O	30	NR	N
271	83	186	O	12	J	N
272	82	184	F	39	R	N
273	80	182	F	43	R	N
274	79	183	M	37	R	S
275	76	182	F	38	R	S
276	73	183	M	19	R	N
277	71	183	O	33	NR	N
278	72	180	M	38	R	N
279	76	178	F	30	R	S
280	77	180	O	18	J	S
281	75	175	O	24	NR	S
282	75	173	O	48	NR	S
283	74	176	M	23	R	N
284	73	178	O	12	J	N
285	74	175	O	36	NR	S
286	74	169	M	44	R	S
287	69	184	F	42	R	S
288	69	186	M	38	R	S
289	68	189	O	29	NR	N
290	66	190	F	42	R	N
291	65	190	M	40	R	N
292	65	192	O	24	NR	N
293	65	198	M	23	R	N
294	60	193	O	35	NR	S
295	59	191	O	36	NR	S
296	59	187	O	26	NR	S
297	56	187	M	24	R	N
298	54	199	M	33	R	N
299	50	193	O	40	NR	N
300	51	186	M	28	R	S
301	48	185	O	18	J	S
302	49	185	M	14	R	N
303	49	182	O	19	NR	S
304	46	182	F	48	R	S
305	43	186	O	29	NR	N
306	43	185	O	15	J	N
307	41	187	O	12	J	N
308	41	190	M	24	R	N
309	37	179	F	36	R	S
310	45	179	M	46	R	S
311	45	177	M	28	R	S
312	38	200	F	66	R	N
313	39	187	M	34	R	N
314	30	186	M	29	R	N
315	32	182	O	40	NR	N
316	31	181	O	20	NR	N
317	35	188	O	26	NR	N
318	37	189	O	30	NR	N
319	39	181	F	46	R	N
320	31	175	O	26	NR	N
321	30	174	O	39	NR	N
322	31	174	M	40	R	N
323	32	174	O	12	J	N
324	33	175	O	14	J	N
325	30	170	M	30	R	N
326	34	170	O	12	J	N
327	32	170	O	16	J	N
328	38	168	O	18	J	N
329	39	169	F	40	R	N
330	41	172	M	38	R	N
331	41	174	O	32	NR	N
332	40	176	O	14	J	N
333	38	176	O	24	NR	N
334	38	178	O	27	NR	N
335	40	179	O	12	J	N
336	26	189	O	23	NR	N
337	26	193	O	25	NR	N
338	24	200	M	34	R	N
339	21	200	M	32	R	N
340	17	200	F	52	R	N
341	16	196	F	65	R	N
342	19	194	O	34	NR	N
343	17	194	O	38	NR	N
344	19	186	F	44	R	N
345	21	165	M	23	R	N
346	29	165	M	55	R	N
347	22	153	M	24	R	N
348	29	158	O	39	NR	N
349	32	162	O	23	NR	N
350	35	157	O	18	J	N
351	37	157	O	17	J	N
352	38	155	O	16	J	N
353	42	152	F	39	R	N
354	43	155	M	39	R	N
355	48	154	O	36	NR	N
356	50	154	O	13	J	N
357	53	156	F	37	R	N
358	57	154	F	49	R	S
359	53	152	O	18	J	N
360	49	150	O	20	NR	N
361	39	147	M	14	R	N
362	50	147	M	35	R	N
363	53	147	O	20	NR	N
364	57	150	F	40	R	N
365	56	151	O	18	J	N
366	59	151	O	26	NR	N
367	57	145	F	34	R	N
368	57	139	O	34	NR	N
369	66	139	O	12	J	N
370	69	139	O	22	NR	N
371	65	147	O	12	J	N
372	66	149	O	20	NR	N
373	68	149	F	42	R	N
374	69	151	M	34	R	N
375	72	149	M	39	R	N
376	74	149	F	48	R	N
377	74	153	O	35	NR	N
378	79	154	F	45	R	N
379	77	154	F	50	R	N
380	77	157	M	23	R	N
381	82	151	M	22	R	N
382	84	151	O	30	NR	S
383	68	154	O	14	J	N
384	70	156	O	14	J	N
385	64	156	O	28	NR	S
386	65	159	O	23	NR	N
387	65	161	M	34	R	N
388	61	164	M	34	R	S
389	66	165	M	37	R	N
390	65	164	O	16	J	N
391	68	165	M	30	R	N
392	72	165	M	41	R	N
393	74	167	M	50	R	N
394	74	163	M	19	R	N
395	71	161	O	38	NR	N
396	70	160	F	47	R	S
397	76	161	F	33	R	N
398	77	163	F	40	R	N
399	76	163	M	35	R	N
400	76	160	O	29	NR	N
401	81	162	M	28	R	N
402	82	162	F	32	R	N
403	83	163	M	38	R	N
404	81	158	O	46	NR	N
405	83	154	F	38	R	N
406	87	152	M	47	R	S
407	86	154	O	12	J	N
408	87	154	O	14	J	N
409	90	154	F	37	R	S
410	91	154	M	20	R	S
411	93	157	F	34	R	S
412	96	155	F	24	R	S
413	98	154	O	15	J	S
414	99	152	M	50	R	S
415	93	161	M	22	R	N
416	91	161	O	20	NR	N
417	95	161	F	40	R	S
418	91	164	M	34	R	N
419	90	164	O	17	J	N
420	90	163	O	23	NR	N
421	88	163	O	30	NR	N
422	87	165	F	31	R	N
423	86	163	O	21	NR	N
424	95	178	F	48	R	S
425	96	169	O	30	NR	S
426	94	174	F	25	R	S
427	105	153	M	28	R	S
428	107	153	M	32	R	N
429	105	157	O	35	NR	S
430	106	159	F	46	R	S
431	108	156	F	38	R	N
432	110	153	M	37	R	S
433	109	158	O	39	NR	N
434	110	159	M	35	R	N
435	111	157	F	26	R	N
436	111	158	O	16	J	N
437	110	157	O	14	J	N
438	113	153	M	42	R	N
439	115	151	M	36	R	N
440	114	152	O	30	NR	N
441	112	149	M	30	R	N
442	111	148	F	46	R	N
443	117	149	O	30	NR	N
444	120	153	F	48	R	N
445	122	147	O	28	NR	N
446	123	153	F	50	R	N
447	123	155	O	24	NR	N
448	124	158	F	36	R	N
449	124	152	O	30	NR	N
450	126	152	O	20	NR	N
451	127	152	M	20	R	N
452	126	148	M	37	R	N
453	121	160	F	29	R	N
454	120	162	M	22	R	N
455	118	160	O	16	J	N
456	122	166	O	26	NR	N
457	120	165	M	42	R	N
458	118	165	O	26	NR	N
459	116	162	O	24	NR	N
460	115	163	O	21	NR	N
461	120	169	O	16	J	N
462	115	166	F	36	R	N
463	109	162	M	46	R	N
464	105	166	M	31	R	N
465	104	165	O	25	NR	N
466	104	162	M	24	R	N
467	102	162	O	21	NR	N
468	100	163	F	29	R	N
469	100	166	M	33	R	N
470	100	168	O	36	NR	N
471	100	169	F	38	R	N
472	101	171	M	43	R	N
473	98	169	F	31	R	N
474	104	172	O	36	NR	N
475	109	170	M	24	R	N
476	110	172	F	36	R	N
477	113	173	O	33	NR	N
478	117	171	O	12	J	N
479	122	177	M	50	R	N
480	120	178	O	38	NR	N
481	117	179	O	24	NR	N
482	112	179	M	28	R	N
483	122	181	O	39	NR	N
484	109	179	M	40	R	N
485	108	181	F	45	R	N
486	102	179	M	45	R	N
487	100	179	F	45	R	N
488	102	176	F	47	R	N
489	99	177	F	43	R	N
490	100	176	M	47	R	N
491	124	180	M	50	R	N
492	126	180	M	37	R	N
493	125	178	O	12	J	N
494	129	179	M	24	R	N
495	136	180	F	45	R	N
496	136	175	F	43	R	N
497	144	179	M	44	R	N
498	143	176	F	42	R	N
499	139	171	F	36	R	N
500	140	168	F	45	R	N
501	142	166	M	46	R	N
502	140	162	F	32	R	N
503	139	161	O	20	NR	N
504	141	156	M	43	R	N
505	137	157	O	36	NR	N
506	136	164	F	37	R	N
507	134	164	O	19	NR	N
508	133	161	O	22	NR	N
509	133	160	M	35	R	N
510	130	161	O	51	NR	N
511	130	163	O	23	NR	N
512	129	159	M	22	R	N
513	129	162	O	33	NR	N
514	129	156	M	36	R	N
515	130	153	O	34	NR	N
516	128	153	O	12	J	N
517	130	151	M	40	R	N
518	132	149	O	25	NR	N
519	130	148	O	38	NR	N
520	130	145	O	27	NR	N
521	129	148	M	25	R	N
522	127	160	M	40	R	N
523	127	163	F	45	R	N
524	125	164	O	16	J	N
525	123	164	O	37	NR	N
526	124	161	O	20	NR	N
527	123	161	O	18	J	N
528	127	167	F	41	R	N
529	129	167	O	20	NR	N
530	131	167	F	32	R	N
531	129	169	O	24	NR	N
532	131	169	O	41	NR	N
533	129	172	O	15	J	N
534	132	173	O	22	NR	N
535	133	172	O	14	J	N
536	133	175	M	38	R	N
537	134	175	F	44	R	N
538	132	178	F	50	R	N
539	131	179	O	20	NR	N
540	133	180	F	43	R	N
541	82	141	O	43	NR	N
542	85	144	F	42	R	N
543	79	134	O	21	NR	N
544	84	130	M	43	R	N
545	85	128	O	21	NR	N
546	86	132	O	18	J	N
547	85	140	M	40	R	N
548	85	143	M	34	R	N
549	87	144	O	50	NR	N
550	87	138	O	12	J	N
551	89	138	O	44	NR	N
552	92	139	M	33	R	N
553	87	146	M	39	R	N
554	90	142	O	29	NR	N
555	92	134	M	44	R	N
556	93	131	O	19	NR	N
557	95	131	O	14	J	N
558	98	134	M	37	R	N
559	101	134	M	36	R	N
560	98	143	F	48	R	S
561	98	142	M	39	R	S
562	99	141	O	45	NR	N
563	100	143	M	25	R	N
564	102	143	M	30	R	N
565	103	143	F	39	R	S
566	103	141	O	17	J	S
567	105	139	M	36	R	S
568	111	143	M	36	R	N
569	109	145	O	13	J	S
570	107	145	O	24	NR	S
571	101	131	O	13	J	N
572	101	127	F	45	R	N
573	102	125	M	26	R	N
574	103	127	O	29	NR	N
575	103	122	O	14	J	N
576	106	119	F	34	R	N
577	99	116	F	37	R	N
578	103	116	O	20	NR	N
579	100	112	O	64	NR	N
580	98	111	M	46	R	N
581	95	116	M	39	R	N
582	93	117	O	16	J	N
583	92	121	O	25	NR	N
584	88	122	O	20	NR	N
585	98	110	F	39	R	N
586	103	107	M	38	R	N
587	103	106	F	33	R	N
588	106	112	M	32	R	N
589	95	109	M	37	R	N
590	95	106	O	41	NR	N
591	93	110	M	23	R	N
592	88	110	M	48	R	N
593	82	110	M	42	R	N
594	75	110	M	38	R	N
595	70	120	M	30	R	N
596	75	115	O	22	NR	N
597	107	125	F	34	R	N
598	110	123	M	47	R	N
599	108	127	F	34	R	N
600	111	124	F	44	R	N
601	108	131	F	41	R	N
602	113	126	F	34	R	N
603	114	126	M	35	R	N
604	114	127	O	36	NR	N
605	118	128	M	36	R	N
606	112	128	M	28	R	N
607	112	130	F	43	R	N
608	113	130	F	46	R	N
609	115	130	M	53	R	N
610	112	137	O	25	NR	N
611	113	140	F	37	R	N
612	113	142	M	33	R	N
613	112	143	M	39	R	N
614	116	142	F	32	R	N
615	117	143	F	52	R	N
616	120	143	M	28	R	N
617	119	143	O	14	J	N
618	120	140	F	40	R	N
619	121	140	M	38	R	N
620	120	146	F	58	R	N
621	119	146	M	42	R	N
622	118	146	O	18	J	N
623	118	147	O	46	NR	N
624	119	148	F	47	R	N
625	121	147	F	44	R	N
626	121	146	M	34	R	N
627	121	145	O	39	NR	N
628	122	144	F	41	R	N
629	123	146	M	29	R	N
630	124	147	F	38	R	N
631	123	147	M	32	R	N
632	125	147	M	30	R	N
633	125	146	M	37	R	N
634	125	145	F	41	R	N
635	124	144	M	40	R	N
636	125	140	M	47	R	N
637	125	137	O	22	NR	N
638	124	133	M	43	R	N
639	121	133	M	49	R	N
640	125	136	M	46	R	N
641	127	128	M	38	R	N
642	131	126	F	39	R	N
643	131	122	M	44	R	N
644	131	133	M	38	R	N
645	133	129	O	24	NR	N
646	130	136	O	40	NR	N
647	130	140	F	53	R	N
648	133	141	M	24	R	N
649	134	143	O	35	NR	N
650	132	143	O	22	NR	N
651	136	140	M	27	R	N
652	136	136	M	46	R	N
653	137	134	O	34	NR	N
654	135	133	M	32	R	N
655	135	129	M	34	R	N
656	135	126	F	37	R	N
657	138	125	O	20	NR	N
658	138	122	F	45	R	N
659	136	120	O	13	J	N
660	139	120	O	15	J	N
661	134	117	F	42	R	N
662	141	111	F	26	R	N
663	143	114	O	27	NR	N
664	145	118	O	12	J	N
665	143	120	O	14	J	N
666	136	109	O	30	NR	N
667	150	111	O	34	NR	N
668	150	105	M	47	R	N
669	150	114	O	16	J	N
670	149	115	O	15	J	N
671	149	114	O	14	J	N
672	156	113	O	19	NR	N
673	154	118	O	14	J	N
674	153	120	O	25	NR	N
675	149	120	O	14	J	N
676	152	122	O	22	NR	N
677	154	124	O	12	J	N
678	149	127	O	27	NR	N
679	155	127	M	28	R	N
680	157	126	O	14	J	N
681	158	127	O	12	J	N
682	160	123	O	32	NR	N
683	165	125	O	13	J	N
684	166	130	O	18	J	N
685	162	127	O	17	J	N
686	155	130	F	42	R	N
687	153	131	O	19	NR	N
688	150	130	O	14	J	N
689	155	132	O	20	NR	N
690	148	130	M	36	R	N
691	148	135	O	23	NR	N
692	146	137	O	25	NR	N
693	145	138	M	26	R	N
694	142	141	M	52	R	N
695	150	141	O	12	J	N
696	154	141	O	24	NR	N
697	160	140	O	29	NR	N
698	163	138	O	32	NR	N
699	158	138	O	22	NR	N
700	157	136	O	18	J	N
701	142	148	M	37	R	N
702	165	141	O	20	NR	N
703	167	140	O	12	J	N
704	164	146	O	43	NR	N
705	159	145	O	14	J	N
706	157	150	O	12	J	N
707	160	151	O	15	J	N
708	155	153	O	15	J	N
709	162	154	O	16	J	N
710	165	155	O	18	J	N
711	166	160	O	22	NR	N
712	167	162	O	20	NR	N
713	145	151	O	14	J	N
714	146	156	M	33	R	N
715	153	156	O	35	NR	N
716	155	159	O	35	NR	N
717	159	160	O	16	J	N
718	155	164	O	33	NR	N
719	155	162	O	12	J	N
720	153	166	O	24	NR	N
721	164	168	O	16	J	N
722	162	174	O	12	J	N
723	166	174	O	20	NR	N
724	166	179	O	12	J	N
725	174	180	F	44	R	N
726	177	180	M	46	R	N
727	175	169	F	44	R	N
728	174	168	O	14	J	N
729	180	169	O	12	J	N
730	184	169	O	24	NR	N
731	184	162	O	40	NR	N
732	184	157	M	43	R	N
733	189	169	F	43	R	N
734	183	143	O	17	J	N
735	182	139	F	42	R	N
736	183	135	F	40	R	N
737	186	134	O	39	NR	N
738	189	131	M	42	R	N
739	186	132	O	39	NR	N
740	182	132	O	15	J	N
741	177	127	M	36	R	N
742	187	128	M	52	R	N
743	192	130	O	54	NR	N
744	193	127	O	47	NR	N
745	190	128	O	24	NR	N
746	190	121	O	13	J	N
747	197	121	F	50	R	N
748	202	121	O	21	NR	N
749	206	119	O	26	NR	N
750	203	117	O	15	J	N
751	199	128	O	36	NR	N
752	203	134	O	32	NR	N
753	205	135	O	16	J	N
754	202	142	O	14	J	N
755	200	143	O	30	NR	N
756	199	144	O	26	NR	N
757	196	146	O	40	NR	N
758	198	148	O	34	NR	N
759	194	148	O	45	NR	N
760	191	138	O	39	NR	N
761	194	151	O	32	NR	N
762	202	147	O	12	J	N
763	206	147	O	22	NR	N
764	207	145	O	12	J	N
765	205	149	O	38	NR	N
766	203	151	O	12	J	N
767	208	147	O	14	J	N
768	209	151	M	39	R	N
769	214	148	O	20	NR	N
770	203	153	O	17	J	N
771	203	157	O	26	NR	N
772	201	156	O	33	NR	N
773	200	154	O	19	NR	N
774	201	160	O	20	NR	N
775	201	162	O	33	NR	N
776	201	166	O	13	J	N
777	203	168	O	21	NR	N
778	206	171	O	14	J	N
779	206	184	O	37	NR	N
780	208	184	O	33	NR	N
781	210	187	O	27	NR	N
782	209	176	O	19	NR	N
783	209	169	O	12	J	N
784	209	162	O	42	NR	N
785	215	167	O	13	J	N
786	217	166	O	49	NR	N
787	217	160	O	25	NR	N
788	220	160	O	19	NR	N
789	224	157	O	16	J	N
790	228	166	O	14	J	N
791	227	178	O	37	NR	N
792	227	181	O	20	NR	N
793	224	178	O	16	J	N
794	226	178	O	15	J	N
795	221	176	O	28	NR	N
796	219	179	O	48	NR	N
797	217	181	O	46	NR	N
798	217	175	F	47	R	N
799	224	135	F	54	R	N
800	215	119	F	41	R	N
801	217	121	O	23	NR	N
802	220	120	O	20	NR	N
803	219	116	O	23	NR	N
804	218	113	M	27	R	N
805	218	118	O	14	J	N
806	173	68	O	41	NR	N
807	179	69	O	12	J	N
808	181	69	O	33	NR	N
809	185	69	F	37	R	N
810	172	72	M	28	R	N
811	189	76	O	12	J	N
812	185	76	M	47	R	N
813	181	76	O	26	NR	N
814	178	74	M	37	R	N
815	174	74	M	62	R	N
816	172	76	O	34	NR	N
817	168	78	M	24	R	N
818	170	81	F	54	R	N
819	158	69	O	26	NR	N
820	158	81	O	24	NR	N
821	179	81	F	56	R	N
822	187	81	O	20	NR	N
823	186	85	O	28	NR	N
824	182	93	M	43	R	N
825	180	90	O	34	NR	N
826	179	96	O	20	NR	N
827	172	96	M	39	R	N
828	170	92	O	41	NR	N
829	166	90	O	22	NR	N
830	170	100	M	49	R	N
831	179	100	O	12	J	N
832	181	102	O	37	NR	N
833	181	107	F	49	R	N
834	182	109	O	54	NR	N
835	193	110	O	16	J	N
836	184	115	O	24	NR	N
837	182	115	O	12	J	N
838	181	112	O	28	NR	N
839	178	112	O	12	J	N
840	178	106	O	26	NR	N
841	175	106	O	26	NR	N
842	172	107	O	18	J	N
843	166	109	O	34	NR	N
844	163	110	O	34	NR	N
845	158	98	M	37	R	N
846	154	98	O	18	J	N
847	150	97	M	34	R	N
848	144	102	O	18	J	N
849	143	102	O	16	J	N
850	148	95	O	18	J	N
851	144	94	O	24	NR	N
852	142	98	O	27	NR	N
853	142	93	O	14	J	N
854	137	97	M	38	R	N
855	133	94	O	34	NR	N
856	131	92	F	26	R	N
857	137	90	O	14	J	N
858	138	88	O	14	J	N
859	127	89	O	16	J	N
860	127	79	F	53	R	N
861	130	77	O	16	J	N
862	123	75	O	31	NR	N
863	120	92	O	20	NR	N
864	112	92	O	28	NR	N
865	111	93	O	12	J	N
866	109	92	O	16	J	N
867	114	96	O	13	J	N
868	108	88	M	26	R	N
869	109	95	F	39	R	N
870	105	99	M	28	R	N
871	101	97	O	14	J	N
872	99	95	O	28	NR	N
873	104	86	F	42	R	N
874	104	81	F	37	R	N
875	99	81	O	33	NR	N
876	98	82	O	39	NR	N
877	98	87	O	40	NR	N
878	97	92	F	43	R	N
879	91	87	M	35	R	N
880	87	87	O	27	NR	N
881	85	85	O	33	NR	N
882	82	85	F	42	R	N
883	77	84	F	49	R	S
884	85	89	O	30	NR	N
885	84	89	O	34	NR	N
886	84	92	O	56	NR	N
887	86	94	O	36	NR	N
888	87	89	O	38	NR	N
889	85	89	O	20	NR	N
890	89	104	F	48	R	N
891	84	104	O	12	J	N
892	73	104	O	44	NR	N
893	82	74	O	17	J	N
894	72	76	O	19	NR	N
895	75	87	M	35	R	S
896	77	89	O	22	NR	S
897	77	92	O	34	NR	N
898	79	92	O	20	NR	N
899	80	91	M	29	R	N
900	81	94	O	41	NR	N
901	68	87	M	46	R	S
902	57	91	F	31	R	S
903	66	92	M	39	R	S
904	66	95	M	41	R	S
905	69	93	O	33	NR	N
906	68	97	O	15	J	N
907	66	100	O	13	J	S
908	62	100	O	13	J	S
909	70	102	O	15	J	N
910	55	74	F	43	R	S
911	56	72	O	18	J	S
912	43	74	F	26	R	S
913	40	75	M	27	R	S
914	44	83	O	12	J	S
915	46	86	O	12	J	S
916	44	88	O	22	NR	S
917	39	84	O	22	NR	S
918	37	82	O	14	J	S
919	34	83	O	20	NR	S
920	36	78	O	23	NR	S
921	33	80	F	59	R	S
922	30	78	O	16	J	S
923	35	92	O	16	J	S
924	30	82	F	34	R	N
925	28	80	F	37	R	S
926	26	81	M	38	R	S
927	26	83	F	52	R	N
928	23	83	F	34	R	N
929	22	81	F	44	R	N
930	28	85	O	35	NR	N
931	30	85	M	36	R	N
932	29	86	O	12	J	N
933	29	90	F	58	R	N
934	31	90	O	13	J	N
935	31	94	O	22	NR	N
936	27	95	O	20	NR	N
937	26	96	O	12	J	N
938	28	96	O	12	J	N
939	27	101	M	25	R	N
940	26	104	F	41	R	N
941	23	85	F	51	R	N
942	20	85	F	52	R	N
943	20	88	O	22	NR	N
944	20	90	O	22	NR	N
945	23	95	O	18	J	N
946	22	105	O	13	J	N
947	22	110	O	31	NR	N
948	24	113	M	37	R	N
949	23	115	O	20	NR	N
950	28	113	F	44	R	N
951	27	116	O	14	J	N
952	23	113	O	17	J	N
953	20	114	M	53	R	N
954	16	119	F	44	R	N
955	20	121	O	40	NR	N
956	18	121	O	26	NR	N
957	23	121	O	36	NR	N
958	25	122	M	33	R	N
959	27	121	F	52	R	N
960	26	125	O	31	NR	N
961	26	127	M	32	R	N
962	28	127	O	36	NR	N
963	32	127	O	14	J	N
964	34	130	O	29	NR	N
965	36	131	O	19	NR	N
966	38	132	O	16	J	N
967	39	127	F	48	R	N
968	41	125	O	28	NR	N
969	43	127	M	31	R	S
970	45	128	O	26	NR	N
971	45	130	O	14	J	N
972	47	130	O	22	NR	N
973	45	137	F	45	R	N
974	54	135	O	22	NR	N
975	56	135	O	28	NR	N
976	55	133	O	15	J	N
977	57	129	M	34	R	N
978	60	131	O	19	NR	N
979	57	136	O	38	NR	N
980	60	126	M	42	R	S
981	62	131	O	22	NR	N
982	65	126	O	39	NR	N
983	26	139	O	29	NR	N
984	30	139	M	41	R	N
985	29	140	O	18	J	N
986	27	142	O	26	NR	N
987	29	65	M	34	R	N
988	24	59	O	16	J	N
989	25	50	O	14	J	N
990	27	47	M	30	R	N
991	22	41	O	24	NR	N
992	34	41	M	38	R	N
993	34	58	M	34	R	N
994	43	57	O	23	NR	N
995	47	51	O	13	J	N
996	54	41	M	30	R	N
997	60	50	M	34	R	N
998	39	36	O	24	NR	N
999	41	34	O	21	NR	N
1000	45	37	O	27	NR	N
1001	52	35	O	21	NR	N
1002	55	35	O	14	J	N
1003	54	33	M	35	R	N
1004	60	32	O	26	NR	N
1005	60	31	F	34	R	N
1006	58	34	O	16	J	N
1007	62	37	O	22	NR	N
1008	66	39	O	30	NR	N
1009	66	43	O	30	NR	N
1010	75	46	O	40	NR	N
1011	65	52	F	37	R	N
1012	214	65	M	52	R	S

## Sheet: ET1 MICROS COORD+SEX
#	x	y	sex
140	223	18	F
140.1	224	19	O
145	220	29	M
146	220	31	F
146.1	219	30	O
146.2	221	32	O
147	213	33	O
148	210	33	O
149	206	31	O
150	222	34	O
151	227	36	O
152	231	42	M
153	229	41	O
154	227	41	F
158	218	46	M
160	220	49	M
161	225	49	F
161.1	224	48	O
162	220	53	O
163	224	58	O
164	219	57	M
165	219	58	F
166	210	58	M
174	218	65	F
174.1	217	64	O
174.2	219	66	O
175	221	65	O
176	224	65	O
177	220	73	M
274	79	183	M
275	76	182	F
279	76	178	F
279.1	75	177	O
279.2	77	179	O
280	77	180	O
281	75	175	O
282	75	173	O
285	74	175	O
285.1	73	174	O
285.2	75	176	O
286	74	169	M
287	69	184	F
288	69	186	M
294	60	193	O
295	59	191	O
296	59	187	O
300	51	186	M
301	48	185	O
303	49	182	O
304	46	182	F
304.1	45	181	O
304.2	47	183	O
309	37	179	F
310	45	179	M
311	45	177	M
358	57	154	F
382	84	151	O
385	64	156	O
388	61	164	M
396	70	160	F
406	87	152	M
409	90	154	F
410	91	154	M
411	93	157	F
412	96	155	F
412.2	95	154	O
413	98	154	O
413.1	97	153	O
414	99	152	M
417	95	161	F
424	95	178	F
425	96	169	O
426	94	174	F
427	105	153	M
429	105	157	O
430	106	159	F
430.1	105	158	O
430.2	107	160	O
432	110	153	M
560	98	143	F
560.1	97	142	O
560.2	99	144	O
561	98	142	M
565	103	143	F
565.1	102	142	O
566	103	141	O
567	105	139	M
569	109	145	O
570	107	145	O
883	77	84	F
883.1	76	83	O
883.2	78	85	O
895	75	87	M
896	77	89	O
901	68	87	M
902	57	91	F
902.1	56	90	O
904	66	95	M
905	69	93	O
907	66	100	O
908	62	100	O
910	55	74	F
910.1	54	73	O
910.2	56	75	O
911	56	72	O
912	43	74	F
913	40	75	M
914	44	83	O
915	46	86	O
916	44	88	O
917	39	84	O
918	37	82	O
919	34	83	O
920	36	78	O
921	33	80	F
921.1	32	79	O
921.2	34	81	O
922	30	78	O
923	35	92	O
925	28	80	F
925.1	29	81	O
926	26	81	M
969	43	127	M
1012	214	65	M

## Sheet: AVE SIZE SEX
		ET1						ET2							ET1+ET2
sex	fol		sex	fol		sex	fol		sex	fol			sex	fol		sex	fol
F	24		M	14		F	16		M	12			F	16		M	12
F	25		M	14		F	21		M	14			F	21		M	14
F	26		M	19		F	24		M	14			F	24		M	14
F	26		M	19		F	24		M	14			F	24		M	14
F	26		M	19		F	25		M	16			F	25		M	16
F	26		M	19		F	26		M	18			F	26		M	17
F	27		M	20		F	26		M	18			F	26		M	17
F	27		M	20		F	26		M	19			F	26		M	18
F	29		M	20		F	26		M	19			F	26		M	18
F	29		M	22		F	26		M	19			F	26		M	18
F	30		M	22		F	26		M	19			F	26		M	19
F	30		M	22		F	27		M	19			F	27		M	19
F	31		M	22		F	27		M	19			F	27		M	19
F	31		M	22		F	27		M	19			F	27		M	19
F	31		M	22		F	29		M	19			F	29		M	19
F	32		M	22		F	29		M	20			F	29		M	19
F	32		M	22		F	29		M	20			F	29		M	19
F	32		M	22		F	29		M	20			F	29		M	19
F	32		M	22		F	30		M	20			F	30		M	19
F	32		M	23		F	30		M	20			F	30		M	20
F	33		M	23		F	31		M	20			F	31		M	20
F	33		M	23		F	31		M	20			F	31		M	20
F	33		M	23		F	31		M	21			F	31		M	20
F	34		M	23		F	32		M	22			F	31		M	20
F	34		M	24		F	32		M	22			F	32		M	20
F	34		M	24		F	32		M	22			F	32		M	20
F	34		M	24		F	32		M	22			F	32		M	20
F	34		M	24		F	32		M	22			F	32		M	20
F	34		M	24		F	33		M	22			F	32		M	20
F	34		M	24		F	33		M	22			F	33		M	20
F	34		M	24		F	33		M	22			F	33		M	21
F	34		M	24		F	34		M	22			F	33		M	21
F	34		M	24		F	34		M	22			F	33		M	22
F	34		M	24		F	34		M	22			F	34		M	22
F	36		M	25		F	34		M	23			F	34		M	22
F	36		M	25		F	34		M	23			F	34		M	22
F	36		M	25		F	34		M	23			F	34		M	22
F	36		M	25		F	34		M	23			F	34		M	22
F	36		M	26		F	34		M	23			F	34		M	22
F	36		M	26		F	34		M	24			F	34		M	22
F	37		M	26		F	34		M	24			F	34		M	22
F	37		M	26		F	34		M	24			F	34		M	22
F	37		M	26		F	34		M	24			F	34		M	22
F	37		M	26		F	34		M	24			F	34		M	22
F	37		M	26		F	34		M	24			F	34		M	22
F	37		M	26		F	36		M	24			F	34		M	22
F	37		M	27		F	36		M	24			F	34		M	23
F	37		M	27		F	36		M	24			F	35		M	23
F	37		M	27		F	36		M	24			F	36		M	23
F	37		M	27		F	36		M	24			F	36		M	23
F	38		M	27		F	36		M	25			F	36		M	23
F	38		M	28		F	36		M	25			F	36		M	23
F	38		M	28		F	36		M	25			F	36		M	23
F	38		M	28		F	36		M	25			F	36		M	23
F	38		M	28		F	37		M	25			F	36		M	23
F	39		M	28		F	37		M	26			F	36		M	23
F	39		M	28		F	37		M	26			F	36		M	24
F	39		M	28		F	37		M	26			F	36		M	24
F	39		M	28		F	37		M	26			F	36		M	24
F	39		M	28		F	37		M	26			F	36		M	24
F	39		M	28		F	37		M	26			F	37		M	24
F	39		M	28		F	37		M	26			F	37		M	24
F	40		M	29		F	37		M	26			F	37		M	24
F	40		M	29		F	37		M	26			F	37		M	24
F	40		M	29		F	37		M	26			F	37		M	24
F	40		M	29		F	37		M	27			F	37		M	24
F	40		M	30		F	37		M	27			F	37		M	24
F	40		M	30		F	38		M	27			F	37		M	24
F	40		M	30		F	38		M	27			F	37		M	24
F	40		M	30		F	38		M	27			F	37		M	24
F	41		M	30		F	38		M	28			F	37		M	25
F	41		M	30		F	38		M	28			F	37		M	25
F	41		M	30		F	39		M	28			F	37		M	25
F	41		M	30		F	39		M	28			F	37		M	25
F	41		M	30		F	39		M	28			F	37		M	25
F	41		M	30		F	39		M	28			F	38		M	25
F	41		M	30		F	39		M	28			F	38		M	25
F	42		M	30		F	39		M	28			F	38		M	25
F	42		M	30		F	39		M	28			F	38		M	26
F	42		M	30		F	40		M	28			F	38		M	26
F	42		M	30		F	40		M	28			F	39		M	26
F	42		M	31		F	40		M	28			F	39		M	26
F	42		M	31		F	40		M	28			F	39		M	26
F	42		M	32		F	40		M	29			F	39		M	26
F	42		M	32		F	40		M	29			F	39		M	26
F	42		M	32		F	40		M	29			F	39		M	26
F	42		M	32		F	40		M	29			F	39		M	26
F	42		M	32		F	41		M	29			F	39		M	26
F	42		M	32		F	41		M	29			F	39		M	26
F	42		M	32		F	41		M	29			F	40		M	26
F	42		M	32		F	41		M	29			F	40		M	26
F	43		M	33		F	41		M	30			F	40		M	26
F	43		M	33		F	41		M	30			F	40		M	27
F	43		M	33		F	41		M	30			F	40		M	27
F	43		M	33		F	41		M	30			F	40		M	27
F	43		M	33		F	41		M	30			F	40		M	27
F	43		M	33		F	41		M	30			F	40		M	27
F	43		M	33		F	42		M	30			F	40		M	27
F	43		M	33		F	42		M	30			F	40		M	27
F	43		M	34		F	42		M	30			F	41		M	27
F	43		M	34		F	42		M	30			F	41		M	27
F	43		M	34		F	42		M	30			F	41		M	27
F	44		M	34		F	42		M	30			F	41		M	27
F	44		M	34		F	42		M	30			F	41		M	28
F	44		M	34		F	42		M	30			F	41		M	28
F	44		M	34		F	42		M	30			F	41		M	28
F	44		M	34		F	42		M	30			F	41		M	28
F	44		M	34		F	42		M	31			F	41		M	28
F	44		M	34		F	42		M	31			F	41		M	28
F	44		M	34		F	42		M	31			F	41		M	28
F	44		M	34		F	42		M	31			F	41		M	28
F	44		M	34		F	43		M	31			F	41		M	28
F	44		M	34		F	43		M	31			F	41		M	28
F	44		M	34		F	43		M	32			F	41		M	28
F	45		M	34		F	43		M	32			F	41		M	28
F	45		M	35		F	43		M	32			F	42		M	28
F	45		M	35		F	43		M	32			F	42		M	28
F	45		M	35		F	43		M	32			F	42		M	28
F	45		M	35		F	43		M	32			F	42		M	28
F	45		M	35		F	43		M	32			F	42		M	28
F	45		M	35		F	43		M	32			F	42		M	28
F	45		M	35		F	43		M	32			F	42		M	29
F	45		M	35		F	43		M	32			F	42		M	29
F	45		M	35		F	43		M	33			F	42		M	29
F	46		M	36		F	43		M	33			F	42		M	29
F	46		M	36		F	43		M	33			F	42		M	29
F	46		M	36		F	44		M	33			F	42		M	29
F	46		M	36		F	44		M	33			F	42		M	29
F	47		M	36		F	44		M	33			F	42		M	29
F	47		M	36		F	44		M	33			F	42		M	29
F	47		M	36		F	44		M	33			F	42		M	29
F	47		M	36		F	44		M	33			F	42		M	29
F	48		M	36		F	44		M	33			F	43		M	30
F	48		M	36		F	44		M	33			F	43		M	30
F	48		M	36		F	44		M	33			F	43		M	30
F	48		M	36		F	44		M	34			F	43		M	30
F	48		M	36		F	44		M	34			F	43		M	30
F	48		M	37		F	44		M	34			F	43		M	30
F	48		M	37		F	45		M	34			F	43		M	30
F	48		M	37		F	45		M	34			F	43		M	30
F	49		M	37		F	45		M	34			F	43		M	30
F	49		M	37		F	45		M	34			F	43		M	30
F	49		M	37		F	45		M	34			F	43		M	30
F	49		M	37		F	45		M	34			F	43		M	30
F	49		M	37		F	45		M	34			F	43		M	30
F	49		M	37		F	45		M	34			F	43		M	30
F	50		M	37		F	45		M	34			F	43		M	30
F	50		M	37		F	45		M	34			F	43		M	30
F	50		M	37		F	45		M	34			F	44		M	30
F	50		M	38		F	45		M	34			F	44		M	30
F	50		M	38		F	45		M	34			F	44		M	31
F	51		M	38		F	46		M	34			F	44		M	31
F	51		M	38		F	46		M	34			F	44		M	31
F	51		M	38		F	46		M	35			F	44		M	31
F	52		M	38		F	46		M	35			F	44		M	31
F	52		M	38		F	46		M	35			F	44		M	31
F	52		M	38		F	46		M	35			F	44		M	31
F	52		M	38		F	46		M	35			F	44		M	31
F	52		M	38		F	47		M	35			F	44		M	31
F	52		M	38		F	47		M	35			F	44		M	32
F	52		M	38		F	47		M	35			F	44		M	32
F	52		M	38		F	47		M	35			F	44		M	32
F	53		M	38		F	47		M	35			F	44		M	32
F	53		M	38		F	48		M	35			F	44		M	32
F	53		M	38		F	48		M	36			F	45		M	32
F	53		M	39		F	48		M	36			F	45		M	32
F	54		M	39		F	48		M	36			F	45		M	32
F	54		M	39		F	48		M	36			F	45		M	32
F	54		M	39		F	48		M	36			F	45		M	32
F	56		M	39		F	48		M	36			F	45		M	32
F	57		M	39		F	48		M	36			F	45		M	32
F	57		M	39		F	48		M	36			F	45		M	32
F	58		M	39		F	48		M	36			F	45		M	32
F	58		M	39		F	49		M	36			F	45		M	32
F	59		M	39		F	49		M	36			F	45		M	32
F	59		M	40		F	49		M	36			F	45		M	32
F	59		M	40		F	49		M	36			F	45		M	32
F	60		M	40		F	49		M	36			F	45		M	33
F	61		M	40		F	49		M	36			F	45		M	33
F	62		M	40		F	50		M	37			F	46		M	33
F	64		M	40		F	50		M	37			F	46		M	33
F	65		M	40		F	50		M	37			F	46		M	33
F	65		M	40		F	50		M	37			F	46		M	33
F	66		M	41		F	50		M	37			F	46		M	33
F	66		M	41		F	50		M	37			F	46		M	33
F	71		M	41		F	50		M	37			F	46		M	33
F	71		M	41		F	51		M	37			F	46		M	33
	43.3316		M	42		F	51		M	37			F	47		M	33
			M	42		F	51		M	37			F	47		M	33
			M	42		F	52		M	37			F	47		M	33
			M	42		F	52		M	37			F	47		M	33
			M	42		F	52		M	37			F	47		M	33
			M	42		F	52		M	37			F	47		M	33
			M	42		F	52		M	38			F	47		M	33
			M	42		F	52		M	38			F	48		M	33
			M	43		F	52		M	38			F	48		M	33
			M	43		F	52		M	38			F	48		M	33
			M	43		F	52		M	38			F	48		M	34
			M	43		F	53		M	38			F	48		M	34
			M	43		F	53		M	38			F	48		M	34
			M	43		F	53		M	38			F	48		M	34
			M	43		F	53		M	38			F	48		M	34
			M	43		F	53		M	38			F	48		M	34
			M	44		F	54		M	38			F	48		M	34
			M	44		F	54		M	38			F	48		M	34
			M	44		F	54		M	38			F	48		M	34
			M	44		F	54		M	38			F	48		M	34
			M	44		F	54		M	38			F	48		M	34
			M	44		F	56		M	38			F	49		M	34
			M	44		F	56		M	39			F	49		M	34
			M	44		F	56		M	39			F	49		M	34
			M	44		F	57		M	39			F	49		M	34
			M	44		F	57		M	39			F	49		M	34
			M	45		F	57		M	39			F	49		M	34
			M	46		F	58		M	39			F	49		M	34
			M	46		F	58		M	39			F	49		M	34
			M	46		F	59		M	39			F	49		M	34
			M	46		F	59		M	39			F	50		M	34
			M	46		F	59		M	39			F	50		M	34
			M	46		F	59		M	39			F	50		M	34
			M	46		F	59		M	39			F	50		M	35
			M	46		F	60		M	40			F	50		M	35
			M	46		F	60		M	40			F	50		M	35
			M	47		F	61		M	40			F	50		M	35
			M	47		F	61		M	40			F	50		M	35
			M	47		F	62		M	40			F	50		M	35
			M	47		F	64		M	40			F	51		M	35
			M	47		F	65		M	40			F	51		M	35
			M	47		F	65		M	40			F	51		M	35
			M	48		F	66		M	40			F	51		M	35
			M	48		F	66		M	41			F	51		M	35
			M	48		F	71		M	41			F	51		M	35
			M	49		F	71		M	41			F	52		M	35
			M	49			43.1502		M	41			F	52		M	36
			M	49					M	41			F	52		M	36
			M	50					M	41			F	52		M	36
			M	50					M	42			F	52		M	36
			M	50					M	42			F	52		M	36
			M	50					M	42			F	52		M	36
			M	50					M	42			F	52		M	36
			M	51					M	42			F	52		M	36
			M	52					M	42			F	52		M	36
			M	52					M	42			F	52		M	36
			M	52					M	42			F	52		M	36
			M	53					M	43			F	53		M	36
			M	53					M	43			F	53		M	36
			M	54					M	43			F	53		M	36
			M	55					M	43			F	53		M	36
			M	55					M	43			F	53		M	36
			M	62					M	43			F	54		M	36
				35.328					M	43			F	54		M	36
									M	43			F	54		M	36
									M	43			F	54		M	36
									M	44			F	54		M	36
									M	44			F	54		M	36
									M	44			F	55		M	37
									M	44			F	55		M	37
									M	44			F	55		M	37
									M	44			F	56		M	37
									M	44			F	56		M	37
									M	44			F	56		M	37
	Table: sex per size class for each plot								M	44			F	56		M	37
									M	44			F	56		M	37
	ET1		ET2		SF1		SF2		M	44			F	56		M	37
	M	F	M	F	M	F	M	F	M	45			F	56		M	37
10-20	9	0	13	1	3	0	5	0	M	45			F	57		M	37
21-30	72	12	13	7	8	0	27	0	M	45			F	57		M	37
31-40	102	58	21	9	32	10	34	2	M	45			F	57		M	37
41-50	57	81	10	16	22	14	11	14	M	45			F	58		M	37
51-60	9	27	2	12	7	10	5	6	M	46			F	58		M	37
61-70	1	7	0	1	1	0	1	0	M	46			F	59		M	37
> 70	0	2	0	0	0	0	0	2	M	46			F	59		M	37
Total	250	187	59	46	73	34	83	24	M	46			F	59		M	37
									M	46			F	59		M	37
% 10 - 20	3.6	0	22.0339	2.17391	4.10959	0	6.0241	0	M	46			F	59		M	37
% 21 - 30	28.8	6.41711	22.0339	15.2174	10.9589	0	32.5301	0	M	46			F	60		M	37
% 10 - 30	32.4	6.41711	44.0678	17.3913	15.0685	0	38.5542	0	M	46			F	60		M	37
									M	46			F	60		M	37
									M	46			F	60		M	38
									M	47			F	61		M	38
	comparing two slopes								M	47			F	61		M	38
	et	sf							M	47			F	62		M	38
	-0.19	-0.33							M	47			F	64		M	38
	0.075	0.082		1.25983	z test				M	47			F	65		M	38
									M	47			F	65		M	38
									M	48			F	66		M	38
									M	48			F	66		M	38
									M	48			F	71		M	38
									M	49			F	71		M	38
									M	49			F	75		M	38
									M	49			F	82		M	38
									M	49				43.9244		M	38
									M	50						M	38
									M	50						M	38
									M	50						M	38
									M	50						M	38
									M	50						M	38
									M	51						M	38
									M	52						M	38
									M	52						M	38
									M	52						M	38
									M	53						M	38
									M	53						M	39
									M	53						M	39
									M	54						M	39
									M	55						M	39
									M	55						M	39
									M	58						M	39
									M	62						M	39
										34.5922						M	39
																M	39
																M	39
																M	39
																M	39
																M	39
																M	39
																M	39
																M	39
																M	39
																M	39
																M	39
																M	39
																M	40
																M	40
																M	40
																M	40
																M	40
																M	40
																M	40
																M	40
																M	40
																M	40
																M	40
																M	40
																M	40
																M	40
																M	40
																M	40
																M	40
																M	41
																M	41
																M	41
																M	41
																M	41
																M	41
																M	41
																M	41
																M	41
																M	41
																M	42
																M	42
																M	42
																M	42
																M	42
																M	42
																M	42
																M	42
																M	42
																M	42
																M	42
																M	42
																M	42
																M	43
																M	43
																M	43
																M	43
																M	43
																M	43
																M	43
																M	43
																M	43
																M	43
																M	43
																M	43
																M	43
																M	43
																M	43
																M	43
																M	44
																M	44
																M	44
																M	44
																M	44
																M	44
																M	44
																M	44
																M	44
																M	44
																M	44
																M	44
																M	44
																M	44
																M	44
																M	45
																M	45
																M	45
																M	45
																M	45
																M	45
																M	45
																M	45
																M	45
																M	46
																M	46
																M	46
																M	46
																M	46
																M	46
																M	46
																M	46
																M	46
																M	46
																M	46
																M	46
																M	47
																M	47
																M	47
																M	47
																M	47
																M	47
																M	47
																M	48
																M	48
																M	48
																M	48
																M	48
																M	49
																M	49
																M	49
																M	49
																M	49
																M	50
																M	50
																M	50
																M	50
																M	50
																M	50
																M	50
																M	50
																M	51
																M	51
																M	51
																M	52
																M	52
																M	52
																M	52
																M	52
																M	52
																M	53
																M	53
																M	53
																M	53
																M	54
																M	54
																M	55
																M	55
																M	55
																M	56
																M	57
																M	58
																M	58
																M	58
																M	62
																M	64
																M	64
																	35.1785
