# Supplementary material for: Best in the company of nearby males: female success in the threatened cycad, Zamia portoricensis
Source: PeerJ. 2018 Jul 24;6:e5252. doi: 10.7717/peerj.5252 (PMC6063211; doi:10.7717/peerj.5252)
Supplement: Data S4 [file peerj-06-5252-s004.xlsx]

## Sheet: ALL INFO
#	x	y	sex	fol	sc	dna
1	3	4	O	14	J	S			seedlings	258
2	7	2	M	22	R	S
3	6	6	O	37	NR	S			#: number on the spatial distribution map
4	11	2	O	18	J	S			x,y: coordinates
5	12	6	O	22	NR	S			fol: # of leaflets on the longest leaf
6	6	15	O	19	NR	S			sc: size class, J juvenile, R reproductive adult, NR non reproductive adult
7	8	14	O	24	NR	N			dna: N not sampled for the microsatellite study, S sampled
8	10	20	O	46	NR	S
9	2	23	O	21	NR	N
10	5	23	O	38	NR	S
11	8	24	O	12	J	S
12	6	28	O	37	NR	S
13	10	25	O	14	J	S
14	11	28	O	16	J	S
15	7	36	O	34	NR	S
16	13	30	O	13	J	N
17	12	24	O	14	J	N
18	17	20	O	16	J	S
19	18	18	O	13	J	S
20	21	22	O	15	J	S
21	14	11	O	18	J	N
22	21	8	O	40	NR	S
23	20	4	O	25	NR	S
24	24	6	M	33	R	S
25	26	12	O	20	NR	S
26	35	12	O	17	J	N
27	33	11	O	20	NR	N
28	36	8	M	19	R	N
29	43	6	O	26	NR	N
30	38	16	O	14	J	N
31	30	20	O	34	NR	S
32	30	30	O	14	J	N
33	32	31	M	32	R	N
34	33	36	O	15	J	N
35	27	36	O	36	NR	S
36	24	40	O	44	NR	S
37	25	43	M	30	R	S
38	17	46	M	30	R	N
39	12	43	O	15	J	N
40	14	51	O	20	NR	N
41	19	53	O	35	NR	N
42	19	56	O	34	NR	N
43	23	54	O	20	NR	N
44	26	57	O	16	J	N
45	32	57	O	32	NR	N
46	28	63	O	25	NR	N
47	28	61	O	38	NR	N
48	23	65	O	40	NR	N
49	17	60	O	23	NR	N
50	11	59	O	26	NR	N
51	14	68	O	13	J	N
52	17	68	O	12	J	N
53	22	68	O	13	J	N
54	22	71	O	30	NR	N
55	22	76	O	14	J	N
56	21	78	O	12	J	N
57	17	76	O	28	NR	N
58	26	74	O	34	NR	N
59	31	76	O	39	NR	N
60	36	71	O	31	NR	N
61	37	78	O	13	J	N
62	37	67	O	22	NR	N
63	41	71	O	34	NR	N
64	43	68	O	20	NR	N
65	45	72	M	41	R	N
66	46	76	O	22	NR	N
67	48	66	O	32	NR	N
68	45	65	O	12	J	N
69	43	65	O	38	NR	N
70	40	57	O	30	NR	N
71	42	52	O	42	NR	N
72	49	53	O	29	NR	N
73	52	56	O	29	NR	N
74	46	36	M	44	R	N
75	52	28	O	22	NR	N
76	57	29	O	13	J	N
77	58	8	O	24	NR	N
78	63	16	O	16	J	N
79	76	23	O	20	NR	N
80	82	22	O	28	NR	N
81	87	8	O	16	J	N
82	64	30	O	12	J	N
83	63	32	O	12	J	N
84	65	32	O	14	J	N
85	70	34	O	21	NR	N
86	67	43	M	36	R	N
87	81	43	O	16	J	N
88	90	41	O	16	J	N
89	91	42	O	14	J	N
90	81	46	O	12	J	N
91	91	47	O	12	J	N
92	94	44	O	39	NR	N
93	73	46	O	12	J	N
94	75	50	O	13	J	N
95	76	56	O	18	J	N
96	77	57	O	40	NR	N
97	73	56	O	18	J	N
98	88	52	O	13	J	N
99	85	64	O	46	NR	N
100	80	63	O	29	NR	N
101	82	67	O	33	NR	N
102	85	72	O	38	NR	N
103	79	73	O	16	J	N
104	78	68	O	16	J	N
105	72	68	O	35	NR	S
106	70	70	O	43	NR	S
107	62	67	O	42	NR	S
108	55	65	O	38	NR	S
109	58	74	O	37	NR	S
110	63	75	O	12	J	S
111	62	76	O	25	NR	S
112	67	79	M	27	R	S
113	73	76	O	16	J	N
114	78	77	O	38	NR	S
115	76	86	O	18	J	N
116	78	90	M	64	R	N
117	73	88	O	38	NR	N
118	72	86	O	15	J	N
119	70	85	O	37	NR	N
120	70	92	O	18	J	N
121	69	89	O	14	J	N
122	68	92	O	43	NR	N
123	69	90	O	16	J	N
124	66	93	O	17	J	N
125	64	92	O	42	NR	N
126	62	90	O	34	NR	N
127	62	87	O	15	J	N
128	58	84	O	12	J	N
129	53	83	M	38	R	S
130	49	83	M	23	R	S
131	48	89	M	37	R	S
132	50	91	O	15	J	S
133	49	93	O	34	NR	S
134	50	95	O	51	NR	S
135	48	96	O	29	NR	N
136	47	96	O	13	J	N
137	51	98	O	12	J	S
138	53	99	M	37	R	S
139	55	98	O	16	J	N
140	56	97	O	19	NR	N
141	61	96	O	32	NR	N
142	59	101	O	22	NR	N
143	61	103	F	50	R	N
144	66	104	M	33	R	N
145	70	105	F	42	R	N
146	71	104	M	34	R	N
147	72	99	M	37	R	N
148	74	99	O	13	J	N
149	76	95	O	14	J	N
150	77	94	O	26	NR	N
151	76	93	O	17	J	N
152	79	92	O	16	J	N
153	85	90	M	22	R	N
154	85	88	O	16	J	N
155	78	100	O	43	NR	N
156	80	101	O	40	NR	N
157	81	103	F	48	R	N
158	80	104	O	27	NR	N
159	79	106	O	20	NR	N
160	76	107	O	45	NR	N
161	73	106	M	22	R	N
162	70	108	O	45	NR	N
163	81	106	O	17	J	N
164	84	106	M	36	R	N
165	86	106	O	42	NR	N
166	88	105	O	23	NR	N
167	90	106	M	39	R	N
168	94	107	O	27	NR	N
169	99	107	O	35	NR	N
170	103	104	M	37	R	S
171	102	107	O	42	NR	N
172	104	106	O	17	J	N
173	101	109	O	30	NR	N
174	98	112	O	25	NR	N
175	95	111	M	20	R	N
176	102	112	M	24	R	N
177	104	112	M	31	R	N
178	103	115	O	22	NR	N
179	101	115	O	12	J	N
180	106	116	O	33	NR	N
181	89	110	O	16	J	N
182	87	113	O	13	J	N
183	90	113	O	18	J	N
184	91	115	O	32	NR	N
185	94	116	M	37	R	N
186	92	117	F	39	R	N
187	83	113	O	19	NR	N
188	79	113	F	75	R	N
189	76	115	O	13	J	N
190	78	117	M	57	R	N
191	74	116	O	14	J	N
192	69	114	O	24	NR	N
193	66	113	O	14	J	N
194	65	110	O	16	J	N
195	63	111	O	34	NR	N
196	58	106	O	45	NR	N
197	57	105	O	12	J	N
198	54	109	O	44	NR	N
199	50	104	O	42	NR	N
200	47	100	O	31	NR	N
201	44	103	O	31	NR	N
202	45	105	O	28	NR	N
203	44	109	M	52	R	N
204	39	104	O	39	NR	N
205	36	101	O	47	NR	N
206	34	97	O	26	NR	N
207	33	93	O	42	NR	N
208	33	88	M	36	R	N
209	34	82	O	36	NR	N
210	3	109	O	39	NR	N
211	5	109	O	23	NR	N
212	3	111	O	23	NR	N
213	4	112	O	28	NR	N
214	11	112	O	12	J	N
215	24	113	O	12	J	N
216	27	114	O	22	NR	N
217	28	113	O	38	NR	N
218	44	116	O	48	NR	N
219	47	119	M	42	R	N
220	59	116	M	43	R	N
221	57	114	M	28	R	N
222	55	117	O	52	NR	N
223	52	114	M	38	R	N
224	66	125	F	50	R	N
225	68	124	O	18	J	N
226	68	122	O	27	NR	N
227	69	121	O	50	NR	N
228	71	121	O	43	NR	N
229	76	127	F	60	R	N
230	79	130	O	42	NR	N
231	79	134	O	29	NR	N
232	82	140	O	26	NR	N
233	90	143	O	27	NR	N
234	90	146	O	41	NR	N
235	90	139	O	24	NR	N
236	95	139	F	54	R	N
237	95	142	O	16	J	N
238	101	147	O	16	J	N
239	102	149	O	38	NR	N
240	100	152	O	19	NR	N
241	92	152	O	32	NR	N
242	94	152	O	46	NR	N
243	98	158	O	24	NR	N
244	90	162	O	32	NR	N
245	83	165	O	38	NR	N
246	77	165	O	42	NR	N
247	75	166	O	46	NR	N
248	75	168	O	35	NR	N
249	75	145	O	23	NR	N
250	77	145	O	31	NR	N
251	72	148	O	24	NR	N
252	63	136	O	44	NR	N
253	64	141	O	16	J	N
254	30	126	O	12	J	N
255	2	131	M	56	R	N
256	2	146	O	26	NR	N
257	8	160	M	40	R	N
258	15	160	O	12	J	N
259	2	164	M	20	R	N
260	5	174	O	31	NR	N
261	13	176	O	43	NR	N
262	16	175	O	12	J	N
263	2	190	O	67	NR	N
264	5	189	O	22	NR	N
265	8	178	O	26	NR	N
266	13	183	M	33	R	N
267	21	176	O	19	NR	N
268	21	172	O	13	J	N
269	35	167	O	19	NR	N
270	35	175	O	14	J	N
271	35	181	O	18	J	N
272	15	190	O	22	NR	N
273	25	192	O	44	NR	N
274	34	189	O	30	NR	N
275	36	187	O	30	NR	N
276	35	186	O	26	NR	N
277	45	180	O	23	NR	N
278	56	175	O	28	NR	N
279	61	182	O	20	NR	N
280	59	190	O	39	NR	N
281	59	198	M	46	R	N
282	55	197	O	18	J	N
283	45	194	O	52	NR	N
284	43	195	F	42	R	N
285	45	188	O	32	NR	N
286	50	186	O	18	J	N
287	42	188	O	65	NR	N
288	40	191	O	22	NR	N
289	62	192	M	43	R	N
290	62	196	O	41	NR	N
291	65	190	O	53	NR	N
292	67	193	O	12	J	N
293	68	189	F	37	R	N
294	71	188	O	19	NR	N
295	71	189	O	16	J	N
296	76	192	O	21	NR	N
297	79	188	O	12	J	N
298	79	185	O	17	J	N
299	81	185	O	14	J	N
300	77	187	O	12	J	N
301	75	186	F	51	R	N
302	76	183	O	17	J	N
303	73	181	O	31	NR	N
304	84	184	O	23	NR	N
305	88	181	O	39	NR	N
306	90	179	O	29	NR	N
307	89	183	O	14	J	N
308	92	181	O	17	J	N
309	95	176	O	12	J	N
310	95	173	O	13	J	N
311	100	174	F	44	R	N
312	104	176	M	44	R	N
313	106	178	O	46	NR	N
314	107	180	O	54	NR	N
315	107	190	F	49	R	N
316	102	198	O	37	NR	N
317	93	198	O	26	NR	N
318	93	191	M	48	R	N
319	96	190	O	25	NR	N
320	99	192	O	21	NR	N
321	112	192	O	18	J	N
322	114	192	O	35	NR	N
323	117	191	M	37	R	N
324	115	190	O	13	J	N
325	113	190	M	28	R	N
326	118	187	O	16	J	N
327	120	191	O	18	J	N
328	126	191	O	22	NR	N
329	123	193	O	15	J	N
330	121	193	O	14	J	N
331	120	195	O	15	J	N
332	118	197	O	28	NR	N
333	111	197	O	16	J	N
334	110	97	O	40	NR	N
335	113	99	O	36	NR	N
336	118	98	O	34	NR	N
337	122	95	O	55	NR	N
338	125	90	O	52	NR	N
339	127	86	M	48	R	N
340	124	84	O	25	NR	N
341	127	80	O	16	J	N
342	119	67	F	56	R	S
343	133	58	O	42	NR	N
344	133	62	O	27	NR	N
345	135	75	O	21	NR	N
346	139	82	O	34	NR	N
347	137	83	O	20	NR	N
348	136	88	O	42	NR	N
349	132	86	M	39	R	N
350	130	87	O	31	NR	N
351	130	83	O	32	NR	N
352	130	91	O	32	NR	N
353	129	94	O	35	NR	N
354	131	96	O	12	J	N
355	130	99	O	43	NR	N
356	135	99	O	32	NR	N
357	130	103	O	28	NR	N
358	134	105	O	35	NR	N
359	130	106	O	42	NR	N
360	128	107	F	44	R	S
361	122	107	O	59	NR	N
362	128	115	O	16	J	N
363	117	108	M	39	R	S
364	114	105	O	26	NR	N
365	122	117	O	48	NR	N
366	109	113	M	37	R	N
367	109	118	F	43	R	N
368	113	120	F	56	R	N
369	113	125	O	39	NR	N
370	113	127	O	39	NR	N
371	108	130	O	24	NR	N
372	111	136	M	39	R	N
373	106	139	O	31	NR	N
374	121	130	M	36	R	N
375	126	132	O	24	NR	N
376	131	117	O	26	NR	N
377	137	118	O	18	J	N
378	135	122	O	36	NR	N
379	139	125	O	25	NR	N
380	135	136	M	26	R	N
381	138	135	O	12	J	N
382	144	128	M	26	R	N
383	149	125	F	41	R	N
384	149	116	O	38	NR	N
385	145	107	O	30	NR	N
386	155	106	M	23	R	N
387	156	118	O	34	NR	N
388	163	118	O	34	NR	N
389	163	113	O	36	NR	N
390	166	111	O	39	NR	N
391	161	115	O	18	J	N
392	166	121	O	12	J	N
393	165	122	M	38	R	N
394	165	126	O	43	NR	N
395	165	129	O	40	NR	N
396	160	127	O	43	NR	S
397	160	130	O	14	J	S
398	163	131	O	14	J	S
399	155	130	M	54	R	S
400	154	126	M	31	R	S
401	152	130	O	18	J	S
402	150	132	O	18	J	S
403	153	135	O	19	NR	N
404	156	136	F	44	R	S
405	158	135	O	20	NR	N
406	161	137	O	16	J	N
407	157	139	M	32	R	S
408	166	136	O	32	NR	N
409	168	132	O	16	J	N
410	158	130	O	16	J	N
411	148	135	O	17	J	N
412	144	140	O	16	J	N
413	145	143	O	44	NR	N
414	140	143	O	29	NR	N
415	140	150	O	16	J	N
416	141	161	O	43	NR	N
417	142	167	O	34	NR	N
418	145	172	O	16	J	N
419	149	178	O	50	NR	N
420	143	185	O	13	J	N
421	142	186	O	14	J	N
422	140	185	O	20	NR	N
423	142	190	O	13	J	N
424	140	191	O	28	NR	N
425	139	194	F	52	R	N
426	136	193	O	31	NR	N
427	136	190	O	40	NR	N
428	135	188	M	33	R	N
429	160	149	O	37	NR	N
430	160	153	O	54	NR	N
431	167	145	O	22	NR	N
432	174	146	F	41	R	N
433	168	153	O	14	J	N
434	165	155	O	22	NR	N
435	161	157	O	20	NR	N
436	161	165	O	28	NR	N
437	163	162	O	30	NR	N
438	166	165	M	40	R	N
439	165	170	O	17	J	N
440	175	165	O	21	NR	N
441	177	170	O	22	NR	N
442	175	175	O	17	J	N
443	179	155	O	32	NR	N
444	179	162	O	16	J	N
445	181	163	O	14	J	N
446	183	168	M	34	R	N
447	181	176	O	19	NR	N
448	179	185	O	30	NR	N
449	186	175	O	23	NR	N
450	188	181	O	26	NR	N
451	192	185	O	20	NR	N
452	194	186	O	14	J	N
453	197	186	O	24	NR	N
454	197	181	O	49	NR	N
455	200	185	O	27	NR	N
456	202	180	O	37	NR	N
457	204	185	M	46	R	N
458	204	178	O	23	NR	N
459	203	175	O	56	NR	N
460	204	171	O	35	NR	N
461	190	176	O	12	J	N
462	190	171	O	20	NR	N
463	192	169	O	25	NR	N
464	198	167	O	15	J	N
465	192	163	O	16	J	N
466	198	163	O	46	NR	N
467	194	159	O	30	NR	N
468	203	160	M	25	R	N
469	197	158	O	12	J	N
470	198	157	O	35	NR	N
471	196	154	O	14	J	N
472	198	154	O	15	J	N
473	193	154	O	50	NR	N
474	188	153	O	18	J	N
475	186	153	O	17	J	N
476	180	150	O	26	NR	N
477	179	141	O	28	NR	N
478	174	139	O	30	NR	N
479	177	116	O	41	NR	N
480	194	114	O	26	NR	N
481	194	106	O	15	J	N
482	199	122	O	41	NR	N
483	194	124	O	29	NR	N
484	191	125	O	23	NR	N
485	199	129	O	19	NR	N
486	183	128	O	13	J	N
487	181	134	O	13	J	N
488	185	137	O	47	NR	N
489	193	143	M	27	R	N
490	196	143	M	21	R	N
491	201	131	O	30	NR	N
492	204	131	O	16	J	N
493	208	128	M	26	R	N
494	205	134	O	12	J	N
495	209	136	M	37	R	N
496	199	136	O	15	J	N
497	204	149	O	13	J	N
498	200	149	O	23	NR	N
499	208	160	O	34	NR	N
500	207	165	O	31	NR	N
501	213	166	O	14	J	N
502	214	160	O	14	J	N
503	215	155	O	50	NR	N
504	216	152	M	25	R	N
505	207	169	O	13	J	N
506	209	172	O	29	NR	N
507	209	180	O	35	NR	N
508	213	183	O	32	NR	N
509	215	181	O	18	J	N
510	218	178	O	15	J	N
511	220	182	O	24	NR	N
512	229	189	O	25	NR	S
513	232	192	O	28	NR	N
514	233	189	M	24	R	S
515	236	191	O	13	J	S
516	236	186	O	16	J	S
517	232	184	O	29	NR	S
518	235	180	O	44	NR	S
519	237	179	O	32	NR	S
520	239	175	O	25	NR	S
521	234	175	O	20	NR	S
522	231	174	O	47	NR	S
523	228	177	O	39	NR	S
524	236	173	O	32	NR	S
525	235	170	O	46	NR	S
526	233	168	O	16	J	S
527	241	173	O	55	NR	S
528	241	170	O	16	J	S
529	240	167	O	30	NR	N
530	238	165	O	20	NR	N
531	231	162	O	12	J	N
532	229	162	O	23	NR	N
533	225	148	O	24	NR	N
534	223	145	O	17	J	N
535	220	133	O	52	NR	N
536	231	129	M	28	R	N
537	230	128	O	15	J	N
538	238	127	O	36	NR	N
539	233	130	O	12	J	N
540	238	132	O	41	NR	N
541	233	135	M	53	R	N
542	234	149	O	54	NR	N
543	231	151	O	25	NR	N
544	226	151	M	24	R	N
545	235	151	M	45	R	N
546	235	154	O	43	NR	N
547	240	150	O	19	NR	N
548	243	149	O	34	NR	N
549	245	150	O	24	NR	N
550	244	155	O	25	NR	N
551	249	159	O	43	NR	N
552	248	162	O	16	J	N
553	244	161	O	41	NR	N
554	244	166	O	13	J	N
555	241	163	O	19	NR	N
556	242	167	M	20	R	N
557	233	125	O	24	NR	N
558	241	124	O	58	NR	N
559	244	123	O	60	NR	N
560	247	122	O	28	NR	N
561	248	125	O	16	J	N
562	242	117	M	32	R	N
563	238	117	O	43	NR	N
564	240	110	O	36	NR	N
565	242	109	O	12	J	N
566	244	109	O	33	NR	N
567	246	111	O	33	NR	N
568	247	104	O	30	NR	N
569	247	97	M	28	R	N
570	244	95	O	20	NR	N
571	241	91	O	17	J	N
572	239	101	O	38	NR	N
573	230	108	O	32	NR	S
574	210	106	F	47	R	S
575	205	101	M	29	R	S
576	207	116	M	32	R	S
577	200	117	O	13	J	N
578	200	120	O	12	J	N
579	210	124	O	26	NR	N
580	212	88	M	27	R	N
581	222	86	O	26	NR	N
582	222	71	O	41	NR	N
583	217	72	O	20	NR	N
584	214	67	O	14	J	N
585	212	75	M	40	R	N
586	206	74	O	12	J	N
587	204	74	O	22	NR	N
588	209	60	O	16	J	N
589	203	66	O	34	NR	N
590	218	59	O	20	NR	N
591	217	54	O	12	J	N
592	217	46	O	23	NR	N
593	219	38	O	16	J	N
594	215	35	M	23	R	N
595	214	32	M	23	R	N
596	217	3	O	18	J	N
597	226	11	M	17	R	N
598	223	56	O	13	J	N
599	226	60	O	16	J	N
600	227	53	O	33	NR	N
601	228	49	O	43	NR	N
602	234	53	O	36	NR	N
603	234	56	O	35	NR	N
604	243	50	O	35	NR	N
605	248	48	O	29	NR	N
606	242	59	O	40	NR	N
607	236	60	O	15	J	N
608	247	67	O	39	NR	N
609	248	70	O	12	J	N
610	238	81	O	34	NR	N
611	196	84	O	23	NR	N
612	192	82	O	29	NR	N
613	182	86	O	12	J	N
614	163	89	O	27	NR	N
615	160	95	O	14	J	N
616	153	95	O	15	J	N
617	155	100	O	16	J	N
618	199	67	O	13	J	N
619	178	67	M	27	R	N
620	208	40	O	18	J	N
621	204	28	O	14	J	N
622	189	40	O	23	NR	N
623	158	10	O	16	J	N
624	155	46	O	28	NR	N
625	158	34	O	26	NR	N
626	141	42	O	27	NR	N
627	131	43	O	14	J	N
628	126	44	O	20	NR	N
629	131	49	O	17	J	N
630	124	18	O	32	NR	N
631	120	16	O	23	NR	N
632	115	25	O	27	NR	N
633	113	27	O	14	J	N
634	108	35	O	36	NR	N
635	101	42	O	38	NR	N
636	103	44	O	13	J	N
637	101	51	O	44	NR	N
638	94	53	O	26	NR	N
639	94	63	O	19	NR	N
640	98	63	O	12	J	N
641	101	59	O	22	NR	N
642	112	56	O	20	NR	N
643	101	68	O	40	NR	S
644	104	71	O	18	J	S
645	112	75	O	27	NR	S
646	98	76	F	41	R	S
647	98	72	O	17	J	S
648	93	80	O	35	NR	S
649	111	86	F	82	R	S
650	109	91	O	24	NR	S
651	105	95	O	51	NR	S
652	93	88	O	14	J	S
653	97	89	O	49	NR	S
654	93	94	O	30	NR	N
655	93	75	O	18	J	N

## Sheet: SF2 MICROS COORD+SEX+SIZE
#	x	y	sex	fol	sc
1	3	4	O	14	J
2	7	2	M	22	R
3	6	6	O	37	NR
4	11	2	O	18	J
5	12	6	O	22	NR
6	6	15	O	19	NR
8	10	20	O	46	NR
10	5	23	O	38	NR
11	8	24	O	12	J
12	6	28	O	37	NR
12.1	5	27	O
12.2	7	29	O
13	10	25	O	14	J
14	11	28	O	16	J
15	7	36	O	34	NR
18	17	20	O	16	J
19	18	18	O	13	J
20	21	22	O	15	J
22	21	8	O	40	NR
22.1	20	7	O
22.2	22	9	O
23	20	4	O	25	NR
24	24	6	M	33	R
25	26	12	O	20	NR
31	30	20	O	34	NR
31.1	29	19	O
31.2	31	21	O
35	27	36	O	36	NR
35.1	26	35	O
35.2	28	37	O
36	24	40	O	44	NR
37	25	43	M	30	R
105	72	68	O	35	NR
105.1	71	67	O
105.2	73	69	O
106	70	70	O	43	NR
106.1	69	69	O
106.2	71	71	O
107	62	67	O	42	NR
107.2	61	66	O
107.3	63	68	O
108	55	65	O	38	NR
108.1	54	64	O
109	58	74	O	37	NR
109.1	57	73	O
109.2	59	75	O
110	63	75	O	12	J
111	62	76	O	25	NR
112	67	79	M	27	R
114	78	77	O	38	NR
129	53	83	M	38	R
130	49	83	M	23	R
130.1	48	82	O
130.2	50	84	O
131	48	89	M	37	R
132	50	91	O	15	J
132.1	49	90	O
133	49	93	O	34	NR
134	50	95	O	51	NR
137	51	98	O	12	J
138	53	99	M	37	R
170	103	104	M	37	R
342	119	67	F	56	R
342.1	119	68	O
342.2	118	66	O
342.3	120	68	O
360	128	107	F	44	R
360.1	127	106	O
360.2	129	108	O
363	117	108	M	39	R
396	160	127	O	43	NR
397	160	130	O	14	J
398	163	131	O	14	J
399	155	130	M	54	R
400	154	126	M	31	R
401	152	130	O	18	J
402	150	132	O	18	J
404	156	136	F	44	R
404.1	155	135	O
404.2	157	137	O
407	157	139	M	32	R
512	229	189	O	25	NR
513	232	192	O	28	NR
515	236	191	O	13	J
516	236	186	O	16	J
517	232	184	O	29	NR
518	235	180	O	44	NR
519	237	179	O	32	NR
520	239	175	O	25	NR
521	234	175	O	20	NR
522	231	174	O	47	NR
523	228	177	O	39	NR
524	236	173	O	32	NR
525	235	170	O	46	NR
526	233	168	O	16	J
527	241	173	O	55	NR
527.1	241	174	O
527.2	240	172	O
527.3	242	174	O
528	241	170	O	16	J
573	230	108	O	32	NR
573.1	229	107	O
573.2	231	109	O
574	210	106	F	47	R
574.1	209	105	O
574.2	211	107	O
575	205	101	M	29	R
576	207	116	M	32	R
643	101	68	O	40	NR
644	104	71	O	18	J
645	112	75	O	27	NR
646	98	76	F	41	R
646.1	97	75	O
646.2	99	77	O
647	98	72	O	17	J
648	93	80	O	35	NR
649	111	86	F	82	R
649.1	110	85	O
649.2	112	87	O
650	109	91	O	24	NR
651.2	105	95	O	51	NR
652	93	88	O	14	J
653	97	89	O	49	NR

## Sheet: AVE SIZE SEX
sex	fol			sex	fol
F	37			M	17
F	39			M	19
F	41			M	20
F	41			M	20
F	41			M	20
F	42			M	21
F	42			M	22
F	43			M	22
F	44			M	22
F	44			M	23
F	44			M	23
F	47			M	23
F	48			M	23
F	49			M	24
F	50			M	24
F	50			M	24
F	51			M	25
F	52			M	25
F	54			M	26
F	56			M	26
F	56			M	26
F	60			M	27
F	75			M	27
F	82			M	27
	49.5			M	27
	10.7703			M	28
				M	28
				M	28
				M	28
				M	29
				M	30
				M	30
				M	31
				M	31
				M	32
				M	32
				M	32
				M	32
				M	33
				M	33
				M	33
				M	33
				M	34
				M	34
				M	36
				M	36
				M	36
				M	36
				M	37
				M	37
				M	37
				M	37
				M	37
				M	37
				M	37
				M	37
				M	38
				M	38
				M	38
				M	39
				M	39
				M	39
				M	39
				M	40
				M	40
				M	40
				M	41
				M	42
				M	43
				M	43
				M	44
				M	44
				M	45
				M	46
				M	46
				M	48
				M	48
				M	52
				M	53
				M	54
				M	56
				M	57
				M	64
					34.0964
					9.81116
