# Supplementary material for: Best in the company of nearby males: female success in the threatened cycad, Zamia portoricensis
Source: PeerJ. 2018 Jul 24;6:e5252. doi: 10.7717/peerj.5252 (PMC6063211; doi:10.7717/peerj.5252)
Supplement: Data S5 — The first sheet carries the raw data; the second has the data to show the relationship between reproductive success and sex ratio; the third sheet has the data for reproductive success by site; and the last shows the data used for the Mantel test in the assessment for spatial autocorrelation. [file peerj-06-5252-s005.xlsx]

## Sheet: REP SUCCESS RAW
	PARCELA 1	ET1						PARCELA 2 SF1
PNUM	NUM	OVT	FEC	% FEC	DIST	M--F	PS	PNUM	NUM	OVT	FEC	% FEC	DIST	M--F	PS
376	1	60	17	28.3333	20	14--10	M	29	1	62	53	85.4839	155	0--2	F		PNUM: # for the spatial dist. Study
340	2	62	17	27.4194	30	2--3	F	151	2	43	30	69.7674	45	3--2	M		OVT: total of ovules
287	3	38	36	94.7368	20	11--5	M	103	3	43	13	30.2326	260	0--1	F		FEC: # of fecunded ovules (seeds)
560	4	56	7	12.5	10	20--10	M	101	4	29	20	68.9655	30	1--3	F		DIST: distance to the nearest male
495	5	42	33	78.5714	50	5--7	F		5	39	27	69.2308	56	1--1	E		M--F: males -- females in the 1.5m radius neighborhood
733	6	48	45	93.75	45	2--2	E		6	26	15	57.6923	95	2--2	E		PS: sex proportion, M male biased, F female biased, E equal, total # no chi square tested
799	7	46	0	0	205	0--1	F		7	35	24	68.5714	50	3--2	M
222	8	59	37	62.7119	10	3--2	M		8	34	0	0	100	1--2	F
146	9	74	0	0	20	4--4	E		9	43	0	0	205	0--1	F
133	10	48	13	27.0833	120	1--1	E		10	36	0	0	245	0--1	F
44	11	82	4	4.87805	35	4--3	M		11	41	0	0	65	1--1	E
929	12	49	35	71.4286	40	4--10	F		12	40	25	62.5	75	1--2	F
1011	13	45	19	42.2222	65	1--1	E		13	55	46	83.6364	60	2--1	M
902	14	36	36	100	85	3--1	M		14	42	31	73.8095	115	1--2	F
587	15	52	45	86.5385	10	8--6	M		15	33	26	78.7879	125	2--2	E
				48.6782								49.9118
PARCELA 3 ET2								PARCELA 4 SF2
PNUM	NUM	OVT	FEC	% FEC	DIST	M--F	PS	PNUM	NUM	OVT	FEC	% FEC	DIST	M--F	PS
9	1	63	9	14.2857	90	5--7	F	157	1	40	22	55	80	9--2	M
30	2	36	30	83.3333	35	6--9	F	236	2	40	20	50	145	1--1	E
52	3	61	8	13.1148	95	1--4	F	368	3	54	10	18.5185	75	6--2	M
	4	43	14	32.5581	70	1--2	F	284	4	42	5	11.9048	150	1--3	F
130	5	67	5	7.46269	110	1--1	E	293	5	33	30	90.9091	65	2--2	E
142	6	48	0	0	130	1--1	E		6	71	32	45.0704	88	1--1	E
168	7	70	42	60	85	4--2	M		7	36	34	94.4444	45	2--1	M
172	8	55	7	12.7273	210	0--2	F		8	38	30	78.9474	70	1--2	F
183	9	62	0	0	65	1--2	F		9	35	12	34.2857	80	1--2	F
189	10	41	26	63.4146	85	2--2	E		10	40	28	70	108	1--4	F
	11	48	7	14.5833	45	1--2	F		11	43	3	6.97674	235	0--2	F
	12	44	0	0	40	3--3	E		12	36	15	41.6667	105	1--2	F
	13	33	0	0	220	0--1	F		13	48	29	60.4167	110	1--1	E
	14	40	12	30	95	2--2	E		14	30	27	90	105	1--2	F
	15	30	25	83.3333	65	4--2	M		15	27	5	18.5185	80	5--2	M
				27.6542								51.1106
	Male biased						Equal						Female biased
DIST	M--F	% FEC		M/F		DIST	M--F	% FEC			DIST	M--F	% FEC		M/F	% FEC
60	2--1	83.6364		2		120	1--1	27.0833			205	0--1	0		0	0
45	2--1	94.4444	89.0404	2		65	1--1	42.2222			260	0--1	30.2326		0	0
85	3--1	100		3		56	1--1	69.2308			205	0--1	0		0	0
10	3--2	62.7119		1.5		65	1--1	0			245	0--1	0		0	0
45	3--2	69.7674		1.5		110	1--1	7.46269			220	0--1	0	6.04651	0	0
50	3--2	68.5714	67.0169	1.5		130	1--1	0			175	0--2	85.4839		0	0
85	4--2	60		2		145	1--1	50			210	0--2	12.7273		0	6.97674
65	4--2	83.3333	71.6667	2		88	1--1	45.0704			235	0--2	6.97674	35.0626	0	11.9048
35	4--3	4.87805		1.3		110	1--1	60.4167	33.4985		100	1--2	0		0.5	12.7273
80	5--2	18.5185		2.5		45	2--2	93.75			75	1--2	62.5		0.5	13.1148
75	6--2	18.5185		3		95	2--2	57.6923			115	1--2	73.8095		0.5	14.2857
10	8--6	86.5385		1.3		125	2--2	78.7879			70	1--2	32.5581		0.5	14.5833
80	9--2	55		4.5		85	2--2	63.4146			65	1--2	0		0.5	27.4194	37	mean
20	11--5	94.7368		2.2		95	2--2	30			45	1--2	14.5833		0.5	30.2326	30	median
20	14--10	28.3333		1.4		65	2--2	90.9091	69.0923		70	1--2	78.9474		0.5	32.5581	32.3206	stdev
10	20--10	12.5		2		40	3--3	0			80	1--2	34.2857		0.5	34.2857	1044.62	var
		58.843				20	4--4	0			105	1--2	41.6667		0.5	41.6667	29.3452	avabdev
								42.12			105	1--2	90	42.8351	0.5	62.5	6.2201	stderror
											30	1--3	68.9655		0.33	68.9655
		% FEC						% FEC			150	1--3	11.9048	40.4351	0.33	70
		4.87805						0			95	1--4	13.1148		0.25	71.4286
		12.5						0			108	1--4	70	41.5574	0.25	73.8095
		18.5185						0			30	2--3	27.4194		0.67	78.5714
		18.5185						0			40	4--10	71.4286		0.4	78.9474
		28.3333						7.46269			50	5--7	78.5714		0.71	83.3333
		55						27.0833			90	5--7	14.2857	46.4286	0.71	85.4839
		60						30			35	6--9	83.3333		0.67	90
		62.7119	59	mean				42.2222	42	mean			37.1405
		68.5714	66	median				45.0704	45	median
		69.7674	31.344	stdev				50	31.5274	stdev
		83.3333	982.448	var				57.6923	993.976	var
		83.6364	26.9137	avabdev				60.4167	27.0934	avabdev
		86.5385	7.83601	stderror				63.4146	7.64653	stderror
		94.4444						69.2308
		94.7368						78.7879
		100						90.9091
								93.75

## Sheet: REP SUCCESS & SEX RATIO
DIST	% FER										DIST	FER											OVT	% FEC
10	12.5										10	7											26	57.6923											OVT	FEC
10	62.7119										10	37											27	18.5185											60	17
10	86.5385										10	45											29	68.9655											62	17
20	28.3333										20	17											30	83.3333											38	36
20	94.7368										20	36											30	90											56	7
20	0										20	0											33	78.7879											42	33
30	27.4194										30	20											33	0											48	45
30	68.9655										30	17											33	90.9091											46	0
35	4.87805										35	30											34	0											59	37
35	83.3333										35	4											35	68.5714											74	0
40	71.4286										40	0											35	34.2857											48	13
40	0										40	35											36	100											82	4
45	93.75										45	34											36	0											49	35
45	69.7674										45	7											36	83.3333											45	19
45	14.5833										45	30											36	94.4444											36	36
45	94.4444										45	45											36	41.6667											52	45
50	78.5714										50	24											38	94.7368											62	53
50	68.5714	53.363									50	33	23.3889										38	78.9474											43	30
56	69.2308										56	27											39	69.2308											43	13
60	83.6364										60	46											40	62.5											29	20
65	42.2222										65	30											40	30											39	27
65	0										65	0											40	55											26	15
65	0										65	25											40	50											35	24
65	83.3333										65	0											40	70											34	0
65	90.9091										65	19											41	0											43	0
70	32.5581										70	30											41	63.4146											36	0
70	78.9474										70	14											42	78.5714											41	0
75	62.5										75	10											42	73.8095											40	25
75	18.5185										75	25											42	11.9048											55	46
80	55										80	22											43	69.7674											42	31
80	34.2857										80	12											43	30.2326											33	26
80	18.5185										80	5											43	0											63	9
85	100										85	42											43	32.5581											36	30
85	60										85	26											43	6.97674											61	8
85	63.4146										85	36											44	0											43	14
88	45.0704										88	32											45	42.2222											67	5
90	14.2857										90	9											46	0											48	0
95	57.6923										95	8											48	93.75											70	42
95	13.1148										95	12											48	27.0833											55	7
95	30										95	15											48	0											62	0
100	0	45.793									100	0	19.3478										48	14.5833											41	26
105	41.6667										105	15											48	60.4167											48	7
105	90										105	27											49	71.4286											44	0
108	70										108	28											52	86.5385											33	0
110	7.46269										110	29											54	18.5185											40	12
110	60.4167										110	5											55	83.6364											30	25
115	73.8095										115	31											55	12.7273											40	22
120	27.0833										120	13											56	12.5											40	20
125	78.7879										125	26											59	62.7119											54	10
130	0										130	0											60	28.3333											42	5
145	50										145	20											61	13.1148											33	30
150	11.9048	46.4665									150	5	18.0909										62	27.4194											71	32
175	85.4839										175	53											62	85.4839											36	34
205	0										205	0											62	0											38	30
205	0										205	0											63	14.2857											35	12
210	12.7273										210	7											67	7.46269											40	28
220	0										220	0											70	60											43	3
235	6.97674										235	3											71	45.0704											36	15
245	0										245	0											74	0											48	29
260	30.2326	7.1338									260	13	3.28571										82	4.87805											30	27
																																			27	5
													M/F	% FEC
	mf	fec											2	83.6364
	2	83.6364											2	94.4444
	2	94.4444											3	100
	3	100											1.5	62.7119
	1.5	62.7119											1.5	69.7674
	1.5	69.7674											1.5	68.5714
	1.5	68.5714											2	60
	2	60											2	83.3333
	2	83.3333											1.3	4.87805
	1.3	4.87805											2.5	18.5185
	2.5	18.5185											3	18.5185
	3	18.5185											1.3	86.5385
	1.3	86.5385											4.5	55
	4.5	55											2.2	94.7368
	2.2	94.7368											1.4	28.3333
	1.4	28.3333											2	12.5
	2	12.5											0	0
	1	27.0833											0	30.2326
	1	42.2222											0	0
	1	69.2308											0	0
	1	0											0	0
	1	7.46269											0	85.4839
	1	0											0	12.7273
	1	50											0	6.97674
	1	45.0704											0.5	0
	1	60.4167											0.5	62.5
	1	93.75											0.5	73.8095
	1	57.6923											0.5	32.5581
	1	78.7879											0.5	0
	1	63.4146											0.5	14.5833
	1	30											0.5	78.9474
	1	90.9091											0.5	34.2857
	1	0											0.5	41.6667
	1	0											0.5	90
	0	0											0.33	68.9655
	0	30.2326											0.33	11.9048
	0	0											0.25	13.1148
	0	0											0.25	70
	0	0											0.67	27.4194
	0	85.4839											0.4	71.4286
	0	12.7273											0.71	78.5714
	0	6.97674											0.71	14.2857
	0.5	0											0.67	83.3333
	0.5	62.5
	0.5	73.8095
	0.5	32.5581
	0.5	0
	0.5	14.5833
	0.5	78.9474
	0.5	34.2857
	0.5	41.6667
	0.5	90
	0.33	68.9655
	0.33	11.9048
	0.25	13.1148
	0.25	70
	0.67	27.4194
	0.4	71.4286
	0.71	78.5714
	0.71	14.2857
	0.67	83.3333

## Sheet: REP SUCCESS X SITE
EL TAMARINDO										SUSÚA FOREST
DIST	% FEC									DIST	% FEC
20	28.3333									90	14.2857
30	27.4194									35	83.3333
20	94.7368									95	13.1148
10	12.5									70	32.5581
50	78.5714									110	7.46269
45	93.75									130	0
205	0									85	60
10	62.7119									210	12.7273
20	0									65	0
120	27.0833									85	63.4146
35	4.87805									45	14.5833
40	71.4286									40	0
65	42.2222									220	0
85	100									95	30
10	86.5385									65	83.3333
155	85.4839									80	55
45	69.7674									145	50
260	30.2326									75	18.5185
30	68.9655									150	11.9048
56	69.2308									65	90.9091
95	57.6923									88	45.0704
50	68.5714									45	94.4444
100	0									70	78.9474
205	0									80	34.2857
245	0									108	70
65	0									235	6.97674
75	62.5									105	41.6667
60	83.6364									110	60.4167
115	73.8095									105	90
125	78.7879									80	18.5185

## Sheet: MANTEL TEST RS
	PARCELA 1 - ET1					PARCELA 3 ET2						PARCELA 2 SF1						PARCELA 4 SF2
PNUM	NUM	X	Y	RS		PNUM	NUM	X	Y	RS		PNUM	NUM	X	Y	RS		PNUM	NUM	X	Y	RS
376	1	74	149	28		9	1	221	48	14		29	1	284	93	85		157	1	81	103	55
340	2	17	200	27		30	2	225	66	83		151	2	182	195	70		236	2	95	139	50
287	3	69	184	95		52	3	240	101	13		103	3	123	189	30		368	3	113	120	19
560	4	98	143	13		2004	4	180	133	33		101	4	119	157	69		284	4	43	195	12
495	5	136	180	79		130	5	202	152	7		1005	5	337	220	69		293	5	68	189	91
733	6	189	169	94		142	6	266	192	0		1006	6	370	225	58		2006	6	149	255	45
799	7	224	135	0		168	7	331	197	60		1007	7	400	220	69		2007	7	153	254	94
222	8	234	103	63		172	8	381	163	13		1008	8	233	214	0		2008	8	148	205	79
146	9	220	31	0		183	9	443	174	0		1009	9	215	211	0		2009	9	162	250	34
133	10	173	40	27		189	10	441	86	63		1010	10	218	215	0		2010	10	310	230	70
44	11	0	103	5		2011	11	0	105	15		1011	11	60	160	0		2011	11	285	238	7
929	12	22	81	71		2012	12	10	90	0		1012	12	30	165	63		2012	12	260	240	42
1011	13	65	52	42		2013	13	50	60	0		1013	13	0	55	84		2013	13	145	250	60
902	14	57	91	100		2014	14	55	30	30		1014	14	30	205	74		2014	14	105	260	90
587	15	103	106	87		2015	15	60	45	83		1015	15	80	210	79		2015	15	8	250	19
** Las plantas fuera de las parcelas fueron identificadas con # 1000 para Parcela 1 y # 2000 para Parcela 2
	ET 30x30												SF 30x30					PARCELA CONTROL
PNUM	NUM	X	Y	RS								PNUM	NUM	X	Y	RS		PNUM	NUM	X	Y	RS
376	1	74	149	28								29	1	284	93	85		29	1	284	93	85
340	2	17	200	27								151	2	182	195	70		151	2	182	195	80
287	3	69	184	95								103	3	123	189	30		103	3	123	189	90
560	4	98	143	13								101	4	119	157	69		101	4	119	157	91
495	5	136	180	79								1005	5	337	220	69		1005	5	337	220	88
733	6	189	169	94								1006	6	370	225	58		1006	6	370	225	92
799	7	224	135	0								1007	7	400	220	69		1007	7	400	220	87
222	8	234	103	63								1008	8	233	214	0		1008	8	233	214	95
146	9	220	31	0								1009	9	215	211	0		1009	9	215	211	99
133	10	173	40	27								1010	10	218	215	0		1010	10	218	215	88
44	11	0	103	5								1011	11	60	160	0		1011	11	60	160	88
929	12	22	81	71								1012	12	30	165	63		1012	12	30	165	89
1011	13	65	52	42								1013	13	0	55	84		1013	13	0	55	93
902	14	57	91	100								1014	14	30	205	74		1014	14	30	205	90
587	15	103	106	87								1015	15	80	210	79		1015	15	80	210	90
9	1	221	548	14								157	1	481	103	55		157	1	481	103	10
30	2	225	566	83								236	2	495	139	50		236	2	495	139	11
52	3	240	601	13								368	3	513	120	19		368	3	513	120	12
2004	4	180	633	33								284	4	443	195	12		284	4	443	195	12
130	5	202	652	7								293	5	468	189	91		293	5	468	189	11
142	6	266	692	0								2006	6	549	255	45		2006	6	549	255	8
168	7	331	697	60								2007	7	553	254	94		2007	7	553	254	20
172	8	381	663	13								2008	8	548	205	79		2008	8	548	205	12
183	9	443	674	0								2009	9	562	250	34		2009	9	562	250	13
189	10	441	586	63								2010	10	710	230	70		2010	10	710	230	15
2011	11	0	605	15								2011	11	685	238	7		2011	11	685	238	7
2012	12	10	590	0								2012	12	660	240	42		2012	12	660	240	12
2013	13	50	560	0								2013	13	545	250	60		2013	13	545	250	16
2014	14	55	530	30								2014	14	505	260	90		2014	14	505	260	11
2015	15	60	545	83								2015	15	408	250	19		2015	15	408	250	10
